# Supplementary material for: Actl7b deficiency leads to mislocalization of LC8 type dynein light chains and disruption of murine spermatogenesis
Source: PubMed Central journal article supplement (PMC10652042; doi:10.1242/dev.201593), 2023-10-27
Supplement: develop-150-201593-s1.pdf [file develop-150-201593-s1.pdf]

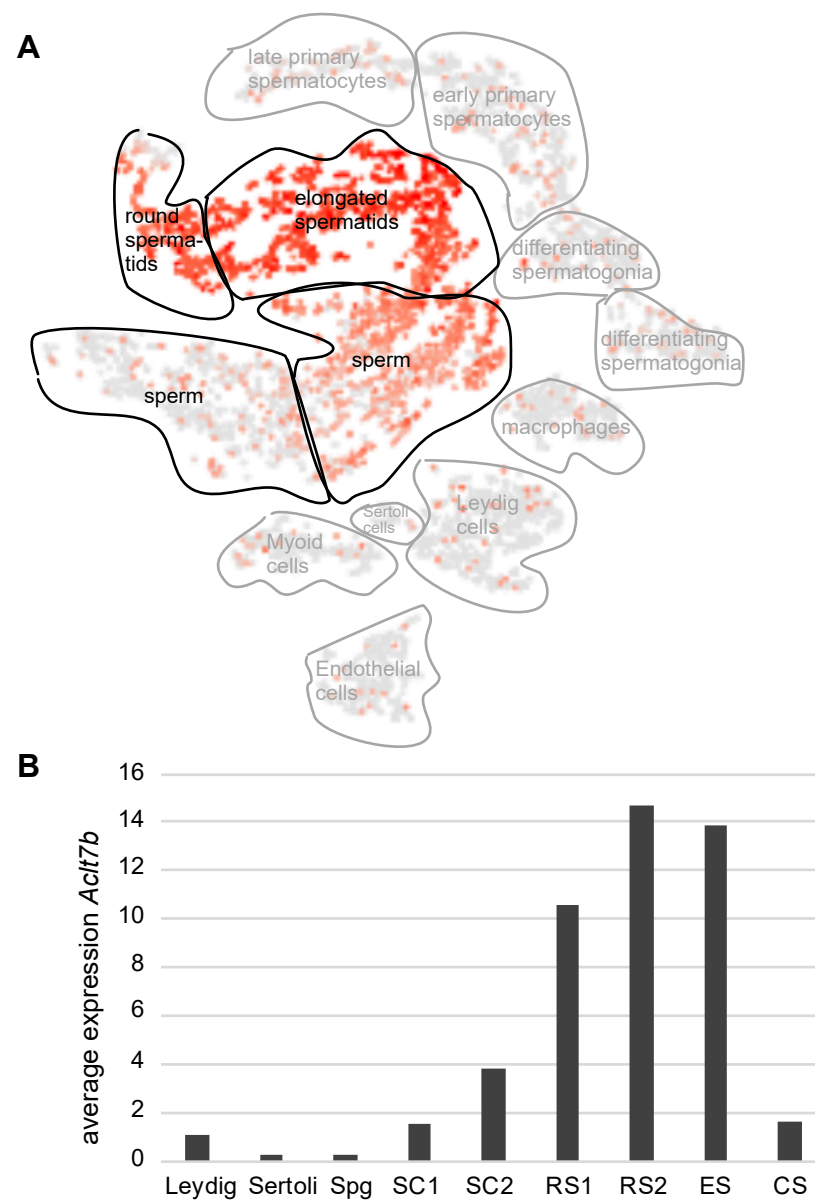

**Fig. S1. *Actl7b* expression in young adult human testicular tissue and murine testicular cells. (A)** Expression data of *ACTL7B* (indicated in red) in human testis extracted from the Human Testis Atlas adapted from Guo *et al.* 2018. *ACTL7B* is expressed mainly in round and elongated spermatids. **(B)** Average normalized expression of *Actl7b* in testicular cell populations of adult mouse testis adapted from Lukassen *et al.* 2018. *Actl7b* is expressed mainly in round and elongated spermatids. Spg: spermatogonia, SC: spermatocytes, RS: round spermatids, ES: elongating spermatids, CS: condensing spermatids

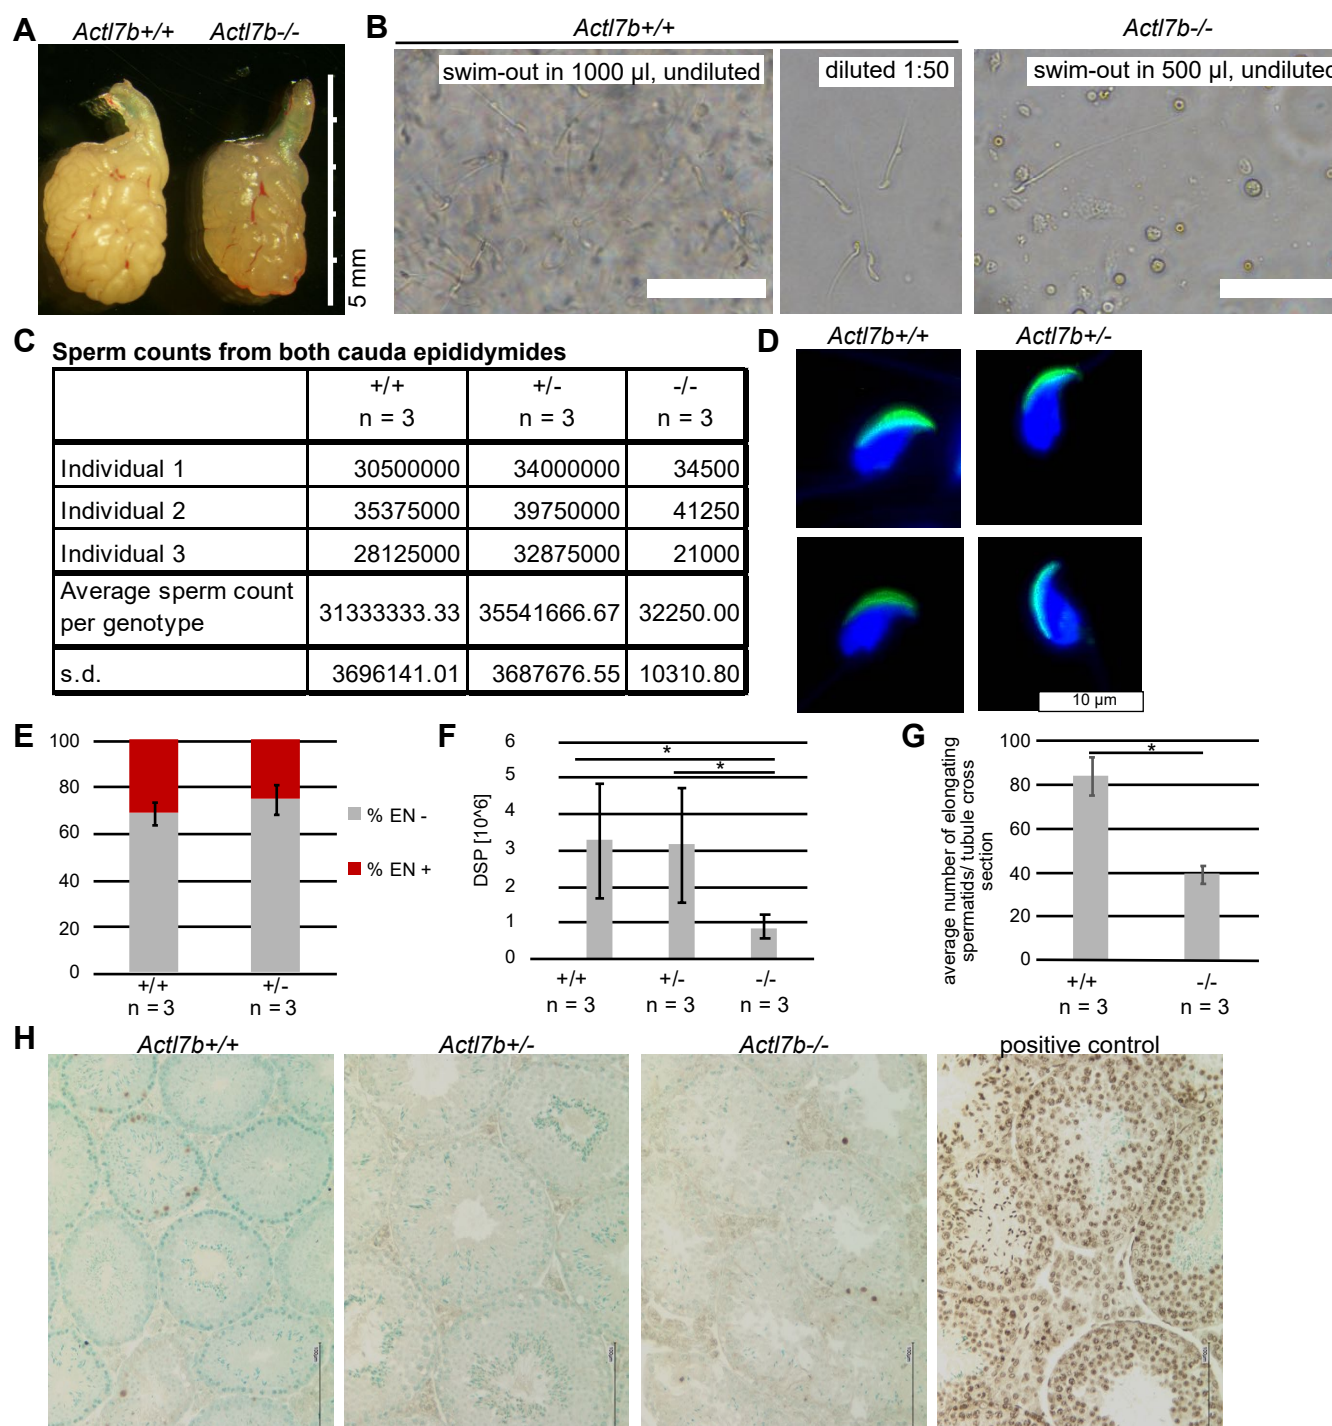

**Fig. S2. Sperm production, morphology and viability of *Actl7b*-deficient mice.** (A) Representative images of cauda epididymides dissected from an *Actl7b*<sup>+/+</sup> and *Actl7b*<sup>-/-</sup> male (littermates). (B) Representative images of cell suspension after swim-out from cauda epididymides from *Actl7b*<sup>+/+</sup> and *Actl7b*<sup>-/-</sup> mice. Scale: 50  $\mu$ m (C) Sperm count of epididymal sperm from *Actl7b*<sup>+/+</sup>, *Actl7b*<sup>+/-</sup> and *Actl7b*<sup>-/-</sup> mice. (D) Representative images of *Actl7b*<sup>+/-</sup> and *Actl7b*<sup>+/+</sup> sperm isolated from cauda epididymis and stained with PNA and DAPI. (E) Percentage of Eosin-Nigrosin positive/negative epididymal sperm from *Actl7b*<sup>+/+</sup> and *Actl7b*<sup>+/-</sup> mice. (F) Average daily sperm production from *Actl7b*<sup>+/+</sup>, *Actl7b*<sup>+/-</sup> and *Actl7b*<sup>-/-</sup> mice. (G) Average number of elongating spermatids counted per PAS-stained seminiferous tubule cross section of *Actl7b*<sup>+/+</sup>, *Actl7b*<sup>+/-</sup> and *Actl7b*<sup>-/-</sup> mice. (H) TUNEL staining on testis sections from *Actl7b*<sup>+/+</sup>, *Actl7b*<sup>+/-</sup> and *Actl7b*<sup>-/-</sup> mice including positive control (slides treated with DNase I, as recommended by the kits manufacturer). Scale: 100  $\mu$ m.

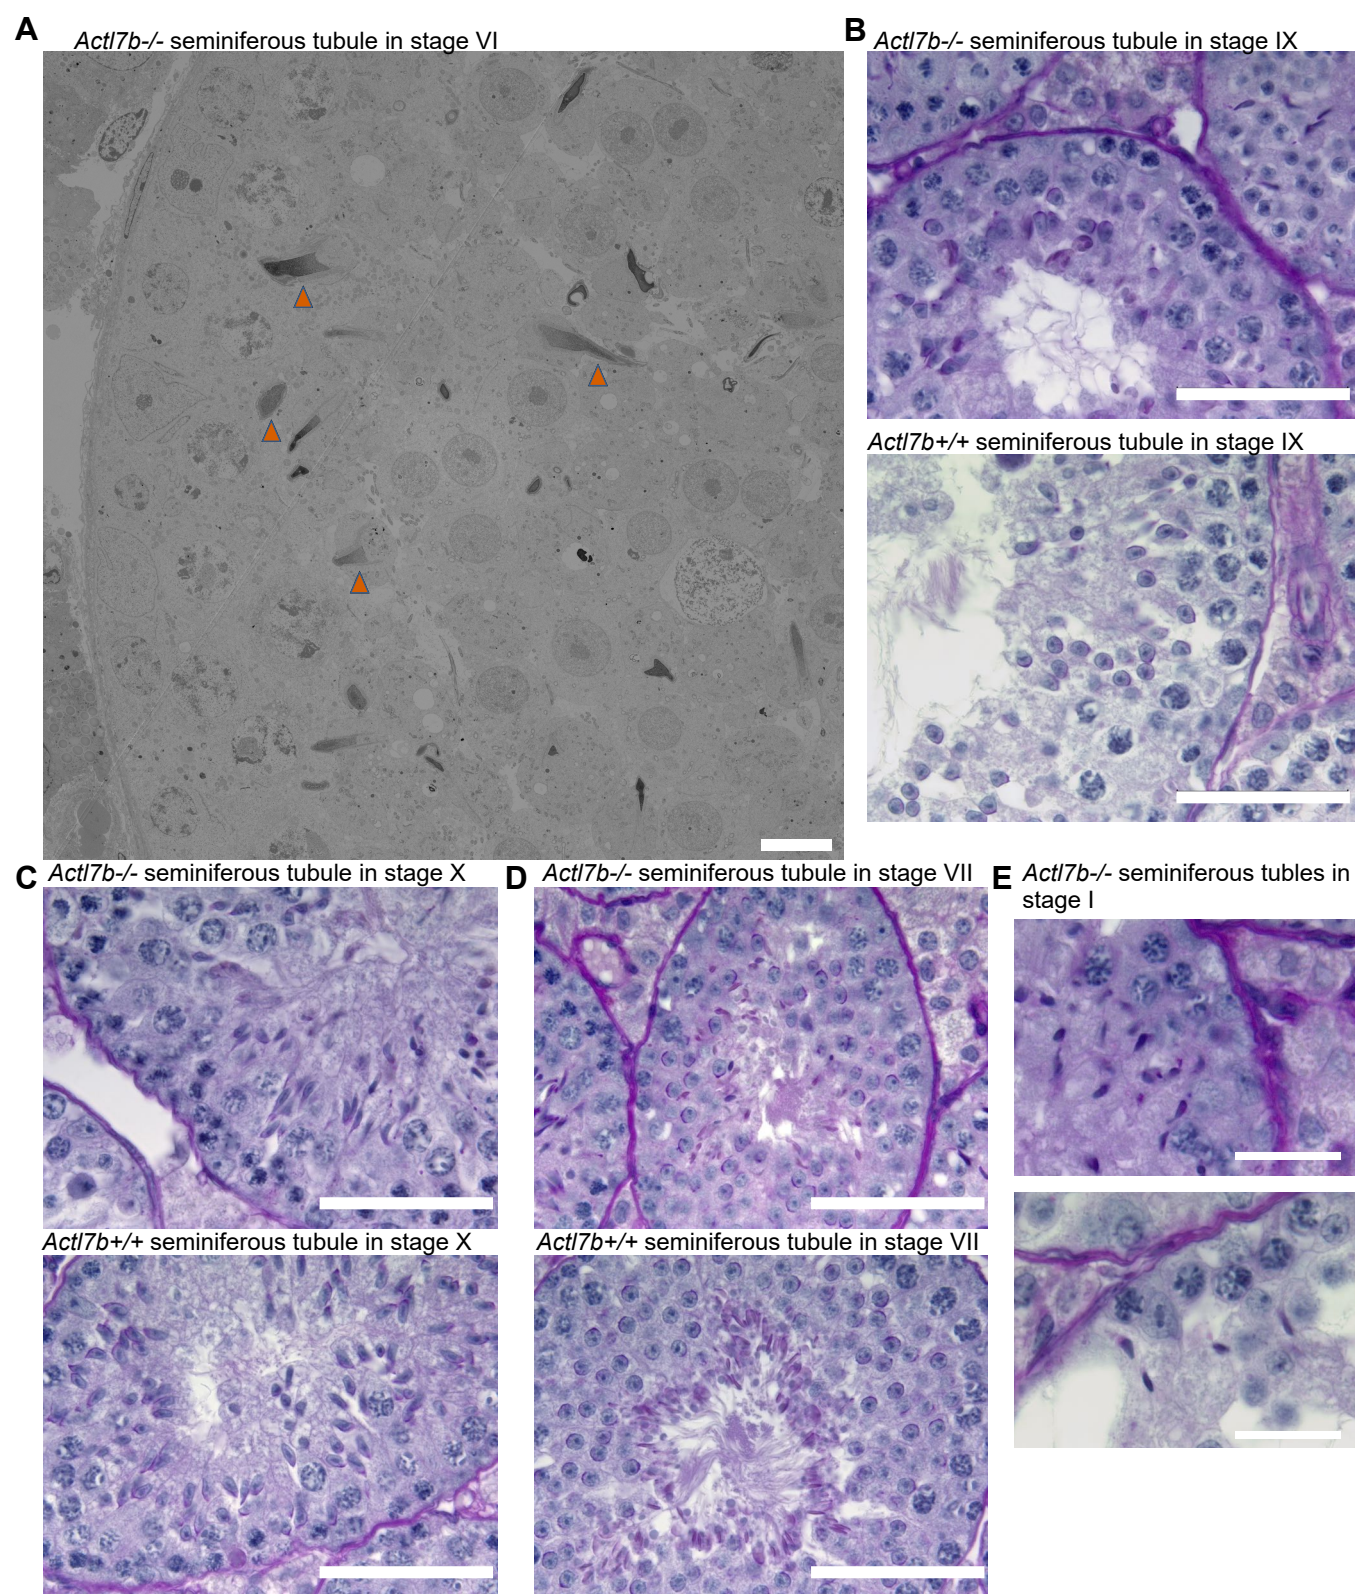

**Fig. S3. Spermatogenesis in *Actl7b*-deficient mice.** (A) Transmission electron micrograph of *Actl7b*<sup>-/-</sup> seminiferous tubule. Elongating spermatids, which should be located closer to the lumen and did not condense properly can be seen (vermillion arrow heads). Scale: 5  $\mu$ m (B) PAS staining of testis sections of stage VI seminiferous tubules of *Actl7b*<sup>+/+</sup> and *Actl7b*<sup>-/-</sup> mice. (C) PAS staining of testis sections of stage X seminiferous tubules of *Actl7b*<sup>+/+</sup> and *Actl7b*<sup>-/-</sup> mice. (D) PAS staining of testis sections of stage VII seminiferous tubules of *Actl7b*<sup>+/+</sup> and *Actl7b*<sup>-/-</sup> mice. (E) PAS staining of testis sections of stage I seminiferous tubules of *Actl7b*<sup>-/-</sup> mice. Scale: 20  $\mu$ m. Scales B-D: 50  $\mu$ m.

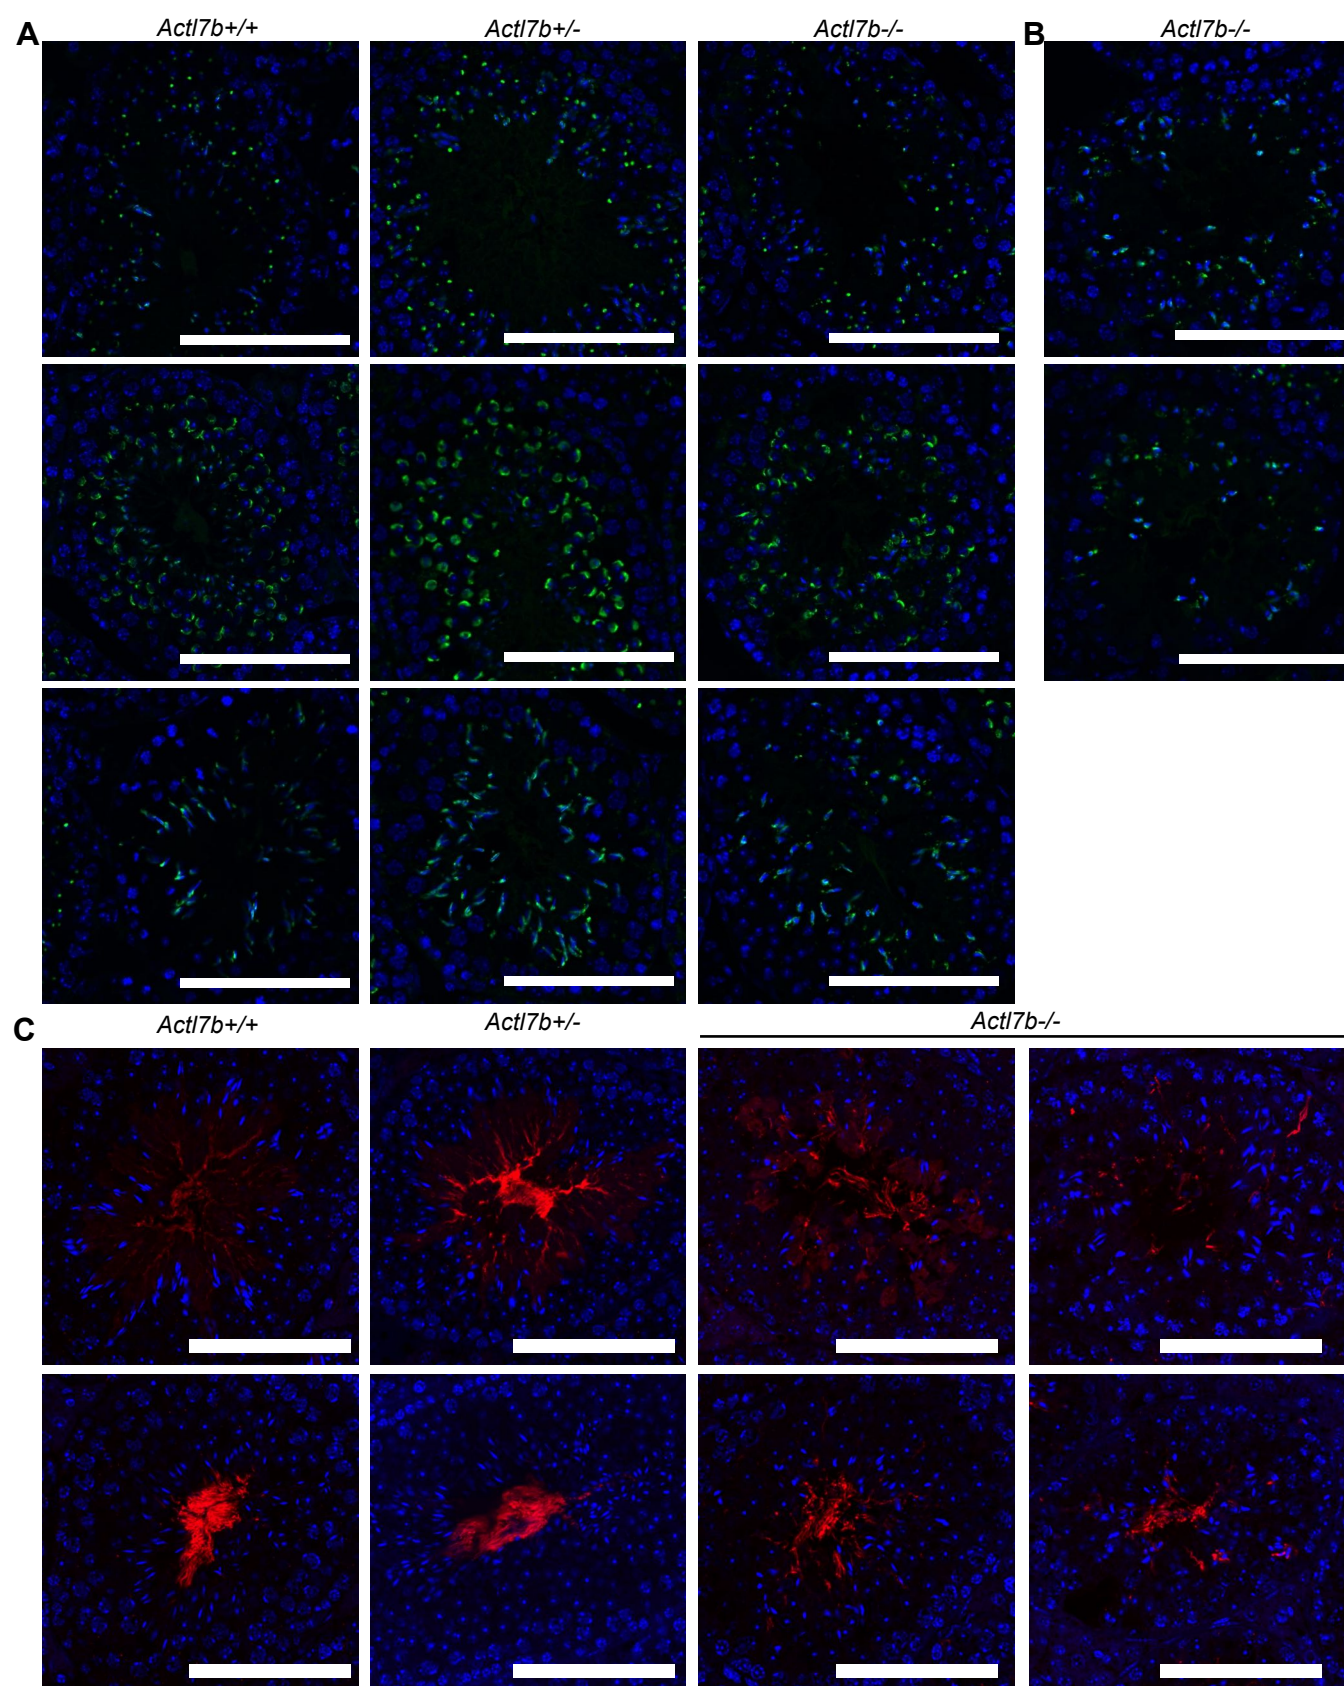

**Fig. S4. Basic spermatogenic parameters in *Actl7b*-deficient mice.** (A) Testis sections from *Actl7b*<sup>+/+</sup>, *Actl7b*<sup>+/-</sup> and *Actl7b*<sup>-/-</sup> mice stained with PNA and DAPI. (B) Testis sections from *Actl7b*<sup>-/-</sup> mice stained with PNA and DAPI. (C) Testis sections from *Actl7b*<sup>+/+</sup>, *Actl7b*<sup>+/-</sup> and *Actl7b*<sup>-/-</sup> mice stained against ODF2 and counterstained with DAPI. Scales: 100  $\mu$ m.

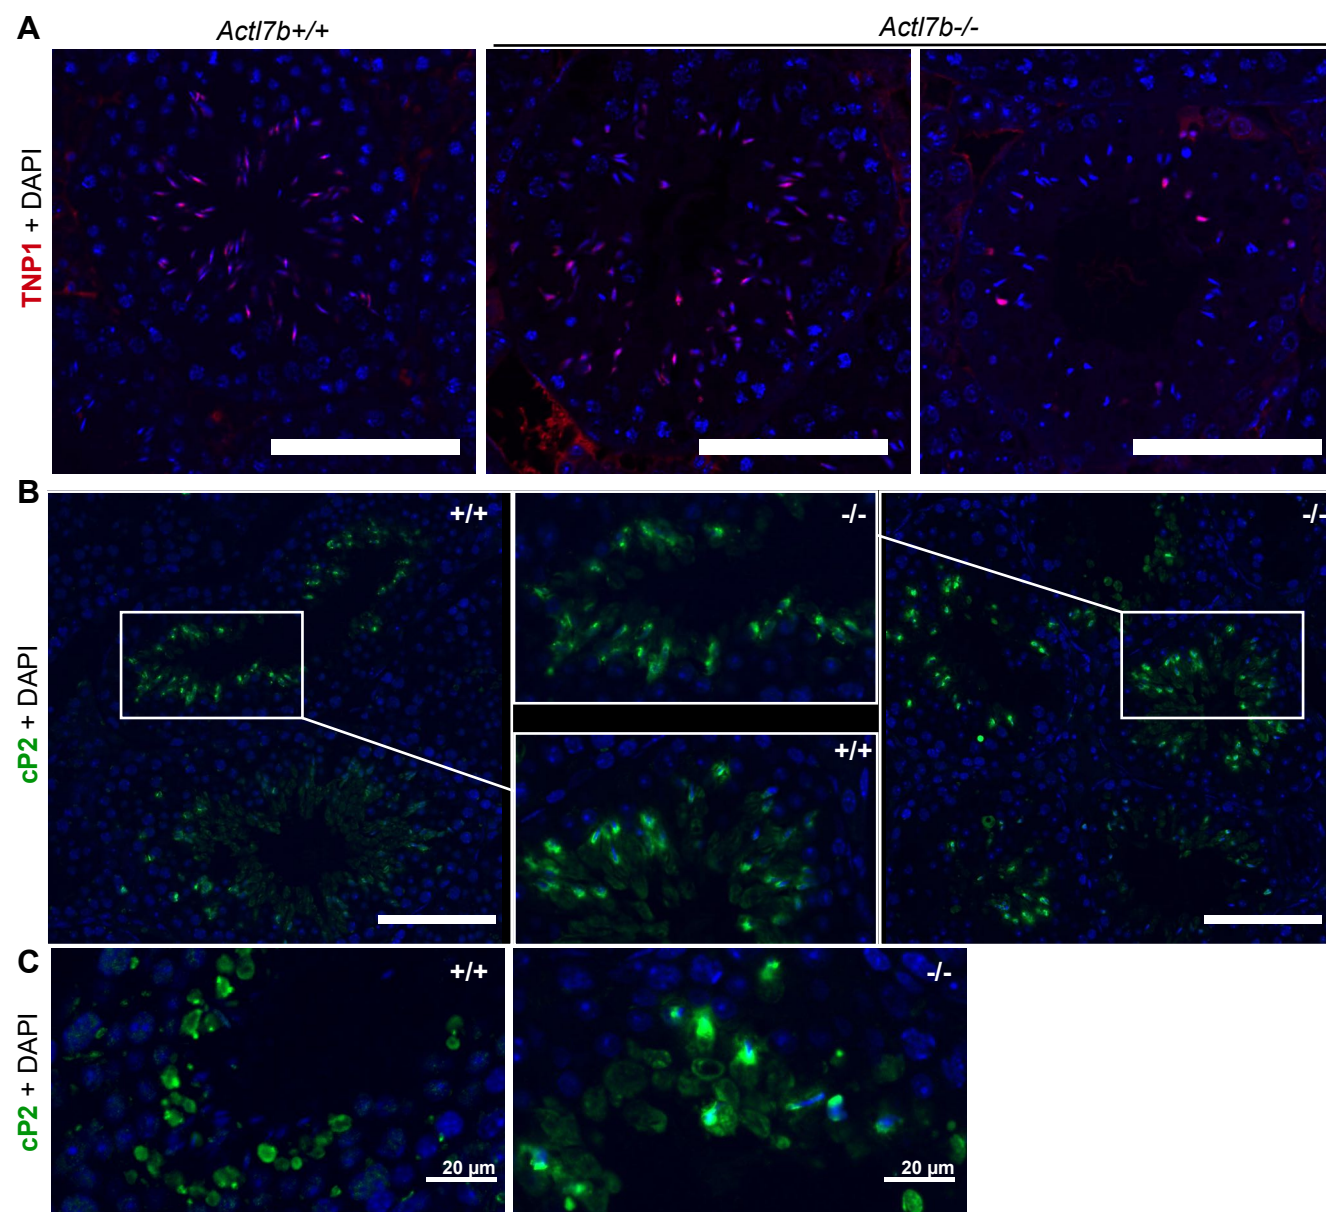

**Fig. S5. Nuclear remodeling in *Act17b*-deficient mice. (A)** IHC staining against TNP1 on *Act17b*<sup>+/+</sup>, *Act17b*<sup>+/-</sup> and *Act17b*<sup>-/-</sup> testis sections. **(B)** IHC staining against the cleaved part of PRM2 on *Act17b*<sup>+/+</sup>, *Act17b*<sup>+/-</sup> and *Act17b*<sup>-/-</sup> testis sections. **(C)** IHC staining against the cleaved part of PRM2 on *Act17b*<sup>+/+</sup> and *Act17b*<sup>-/-</sup> testis sections. Scales A, B: 100  $\mu$ m.

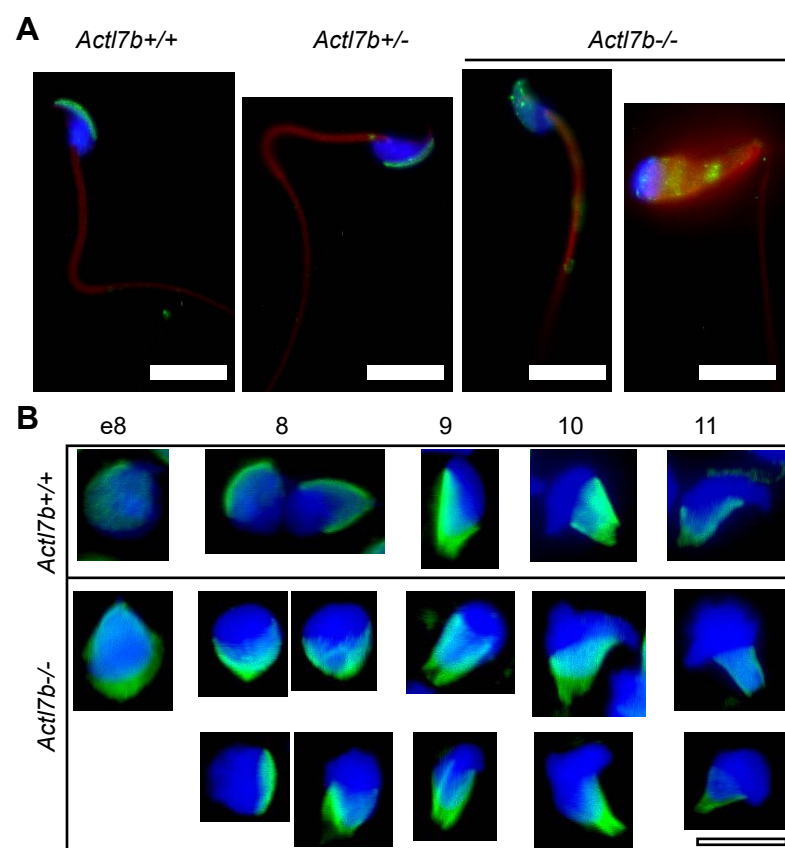

**Fig. S6. Flagella and manchette formation in *Actl7b*-deficient mice. (A)** Representative images of *Actl7b*<sup>+/+</sup>, *Actl7b*<sup>+/-</sup> and *Actl7b*<sup>-/-</sup> sperm isolated from cauda epididymis and stained with PNA, Mitotracker and DAPI. **(B)** Stainings of the manchette in *Actl7b*<sup>+/+</sup> and *Actl7b*<sup>-/-</sup> spermatids isolated from testis. e8 = early step 8 spermatids, 8-11 = step 8-11 spermatids. Scales: 10  $\mu$ m.

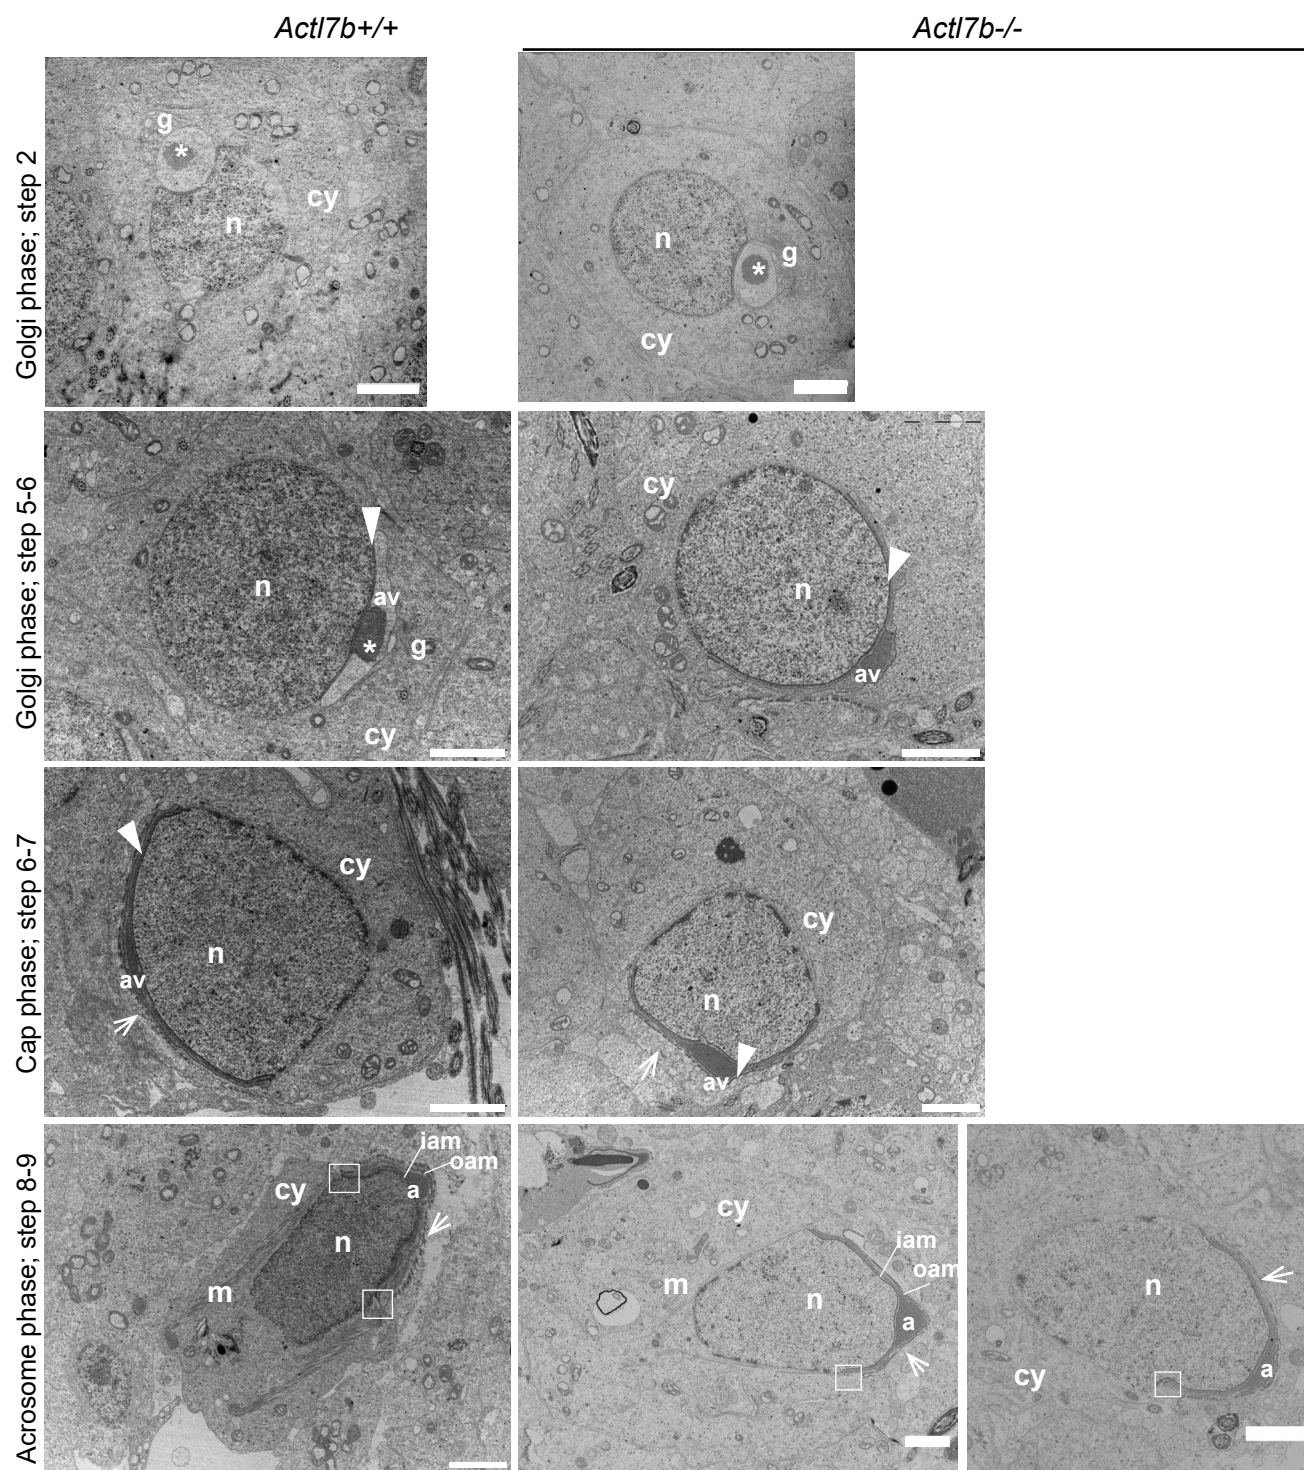

**Fig. S7. Transmission electron micrographs of developmental steps 2-9 of spermiogenesis in WT and *Actl7b*-deficient mice.** n: nucleus; cy: cytoplasm; boxes: marginal ring region; white \*: acrosomal granule/ acrosomal vesicle; av: acrosomal vacuole; a: acrosome; m: manchette microtubules; iam: inner acrosomal membrane; oam: outer acrosomal membrane; white arrow: ectoplasmic F-actin bundles. Scale: 2 μm.

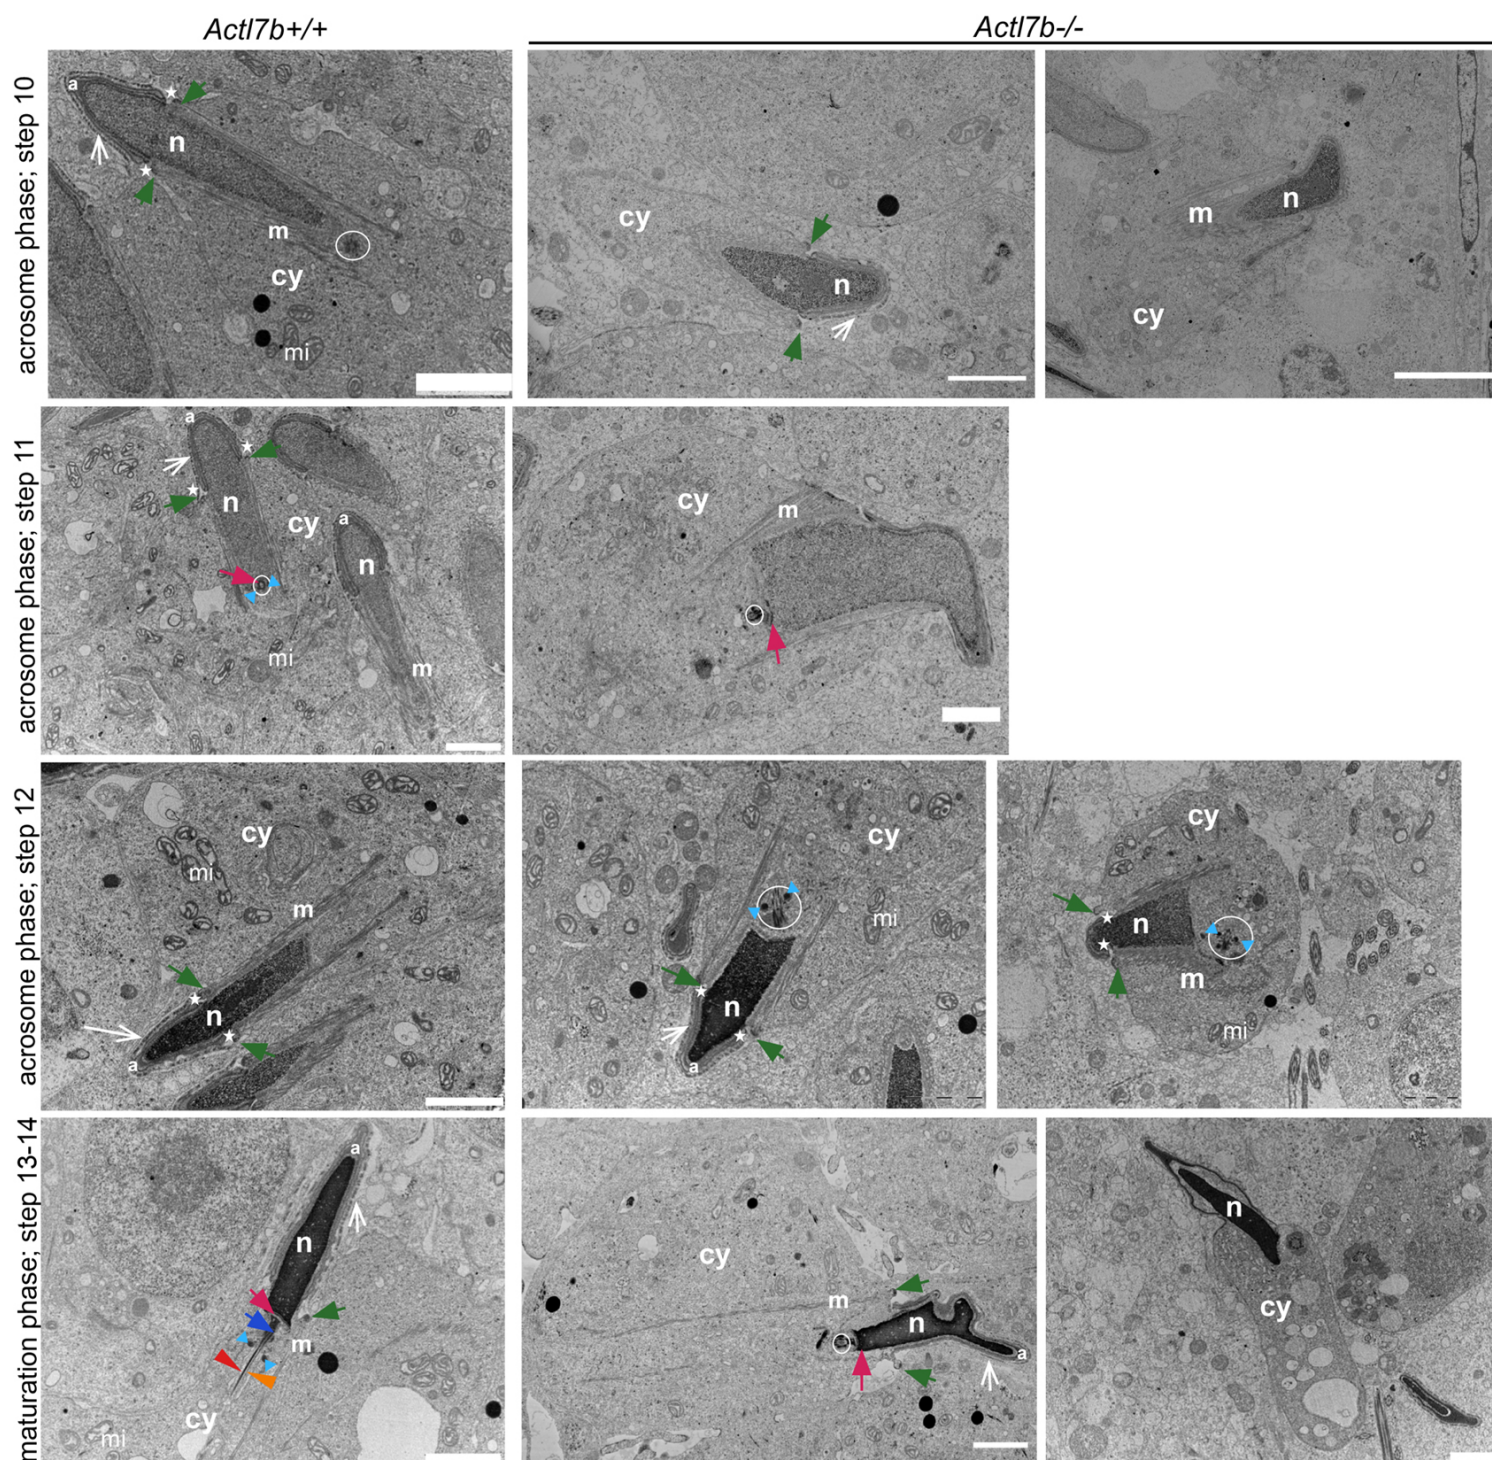

**Fig. S8. Transmission electron micrographs of developmental steps 10-14 of spermiogenesis in WT and *Act17b*-deficient mice.** n: nucleus; cy: cytoplasm; boxes: marginal ring region; white \*: acrosomal granule/acrosomal vesicle; a: acrosome; m: manchette microtubules; white arrow: ectoplasmic F-actin bundles; star: groove belt region; mi: mitochondria; encircled: proximal centriole; light blue arrow heads: annulus; green arrow: perinuclear ring; fuchsia arrow: basal plate; blue arrow: segmented column; red arrow head: axoneme; orange arrow heads: outer dense fibers. Scale: 2  $\mu$ m.



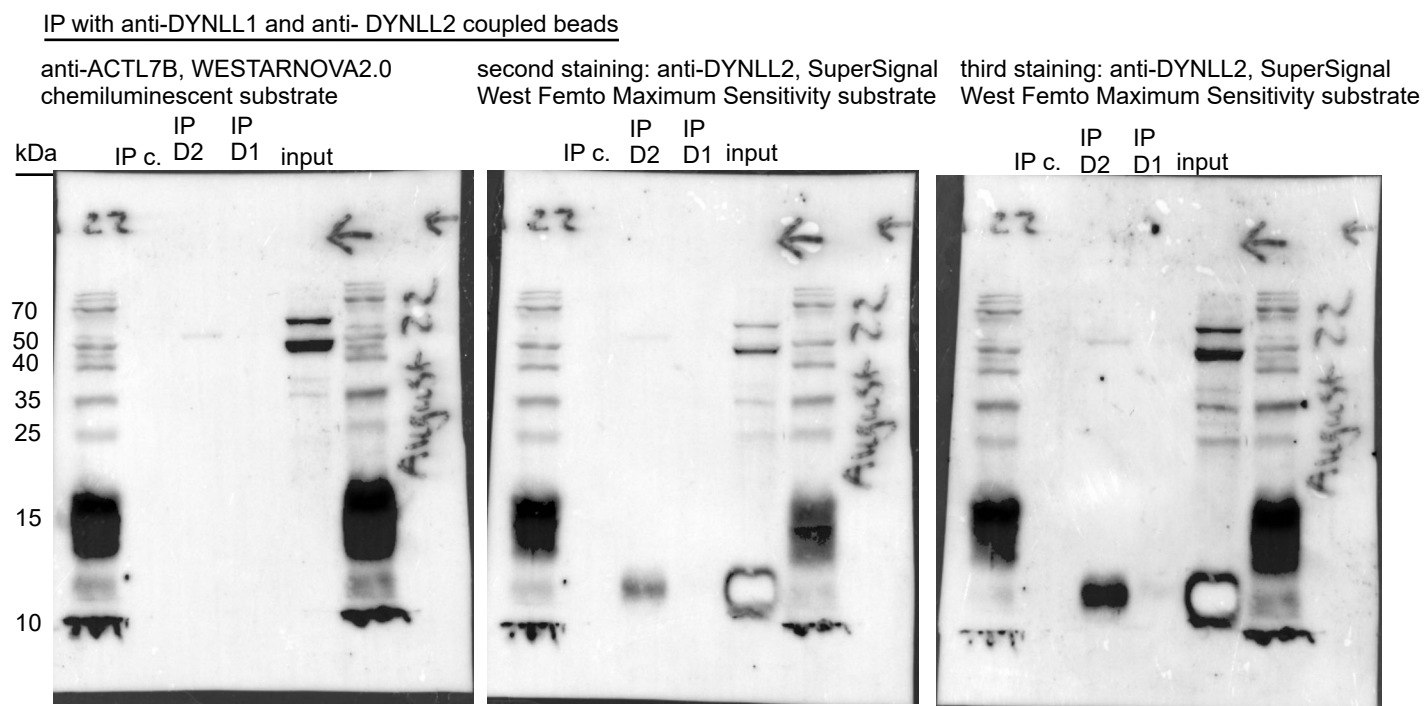

**Fig. S9. Western blots of IPs using anti-DYNLL1 and anti-DYNLL2 coupled beads and bead only controls.** Merged pictures of protein bands detected and colorimetric picture of the membrane with protein ladder. Note: The anti-ACTL7B antibody (13537-1-AP; Proteintech) has been shown to generate unspecific bands in western blot using mouse testis tissue subjected to SDS PAGE (see suppliers webpage). The specific band runs at a height of around 45 kDa.

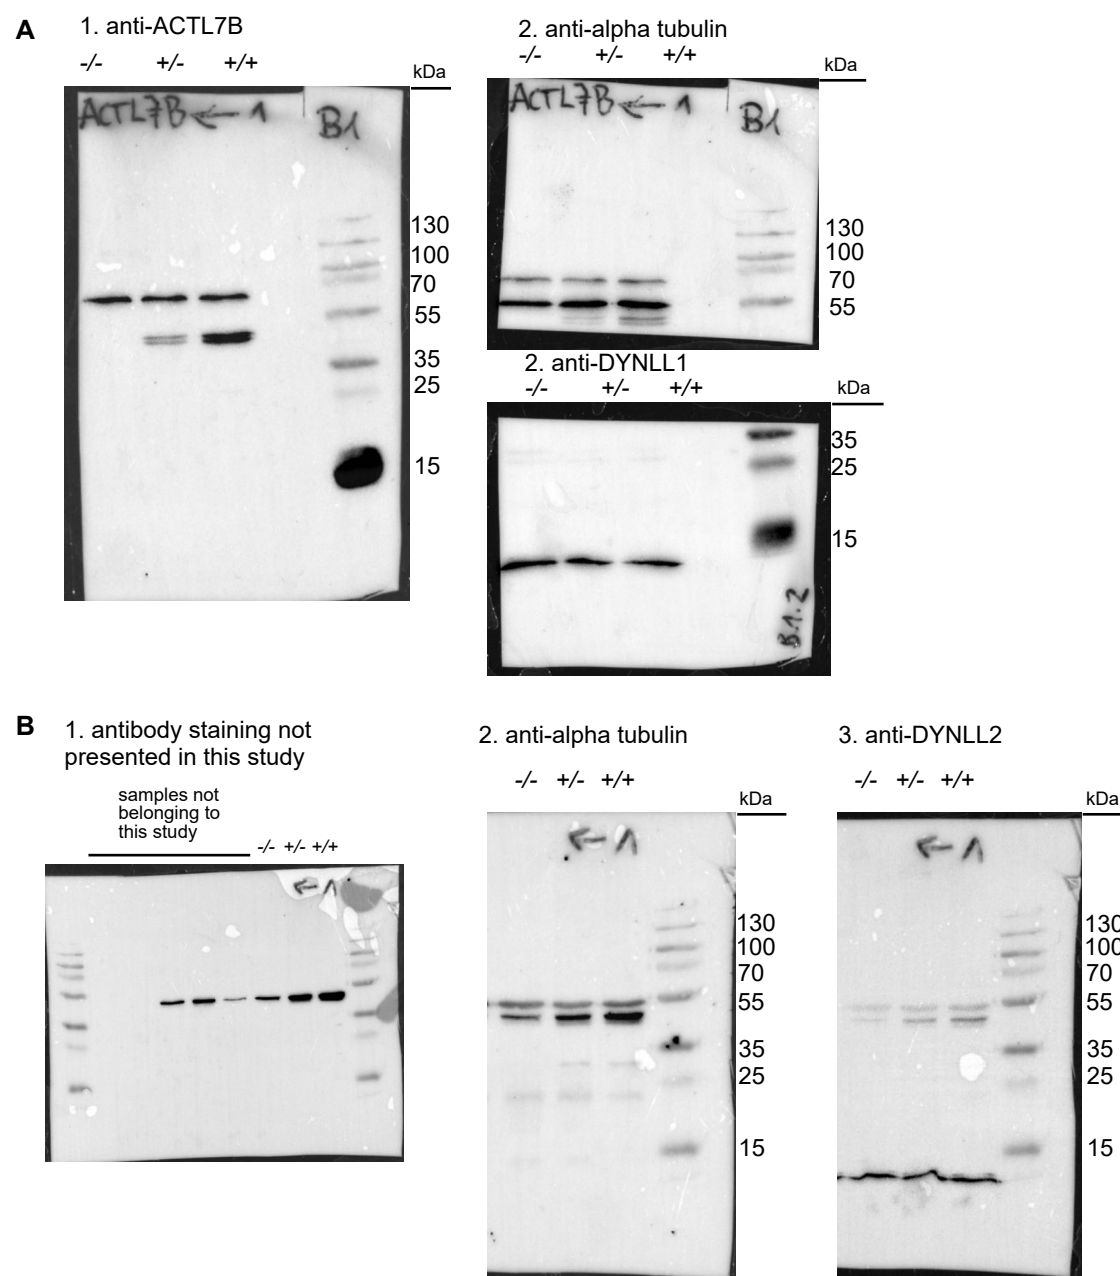

**Fig. S10. Western blots on protein extractions from whole testis from *Actl7b*<sup>+/+</sup>, *Actl7b*<sup>+/-</sup> and *Actl7b*<sup>-/-</sup> mice.**

**(A)** Membrane stained with (1.) anti-CTL7B, then cut in half to prevent cross-staining. Upper half was stained against alpha-tubulin and lower half was stained against DYNLL1. **(B)** Membrane stained with (1.) an antibody not presented in this study. Samples not belonging to this study are marked. The lanes presented in this study (cropped) were stained against alpha-tubulin and subsequently DYNLL2. Ladder: Thermo Scientific™ PageRuler™ Plus Prestained Protein Ladder, 10 to 250 kDa. Merged pictures of protein bands detected and colorimetric picture of the membrane with protein ladder are shown.

Note: The anti-CTL7B antibody (13537-1-AP; Proteintech) has been shown to generate unspecific bands in western blot using mouse testis tissue subjected to SDS PAGE (see suppliers webpage). The specific band runs at a height of around 45 kDa.

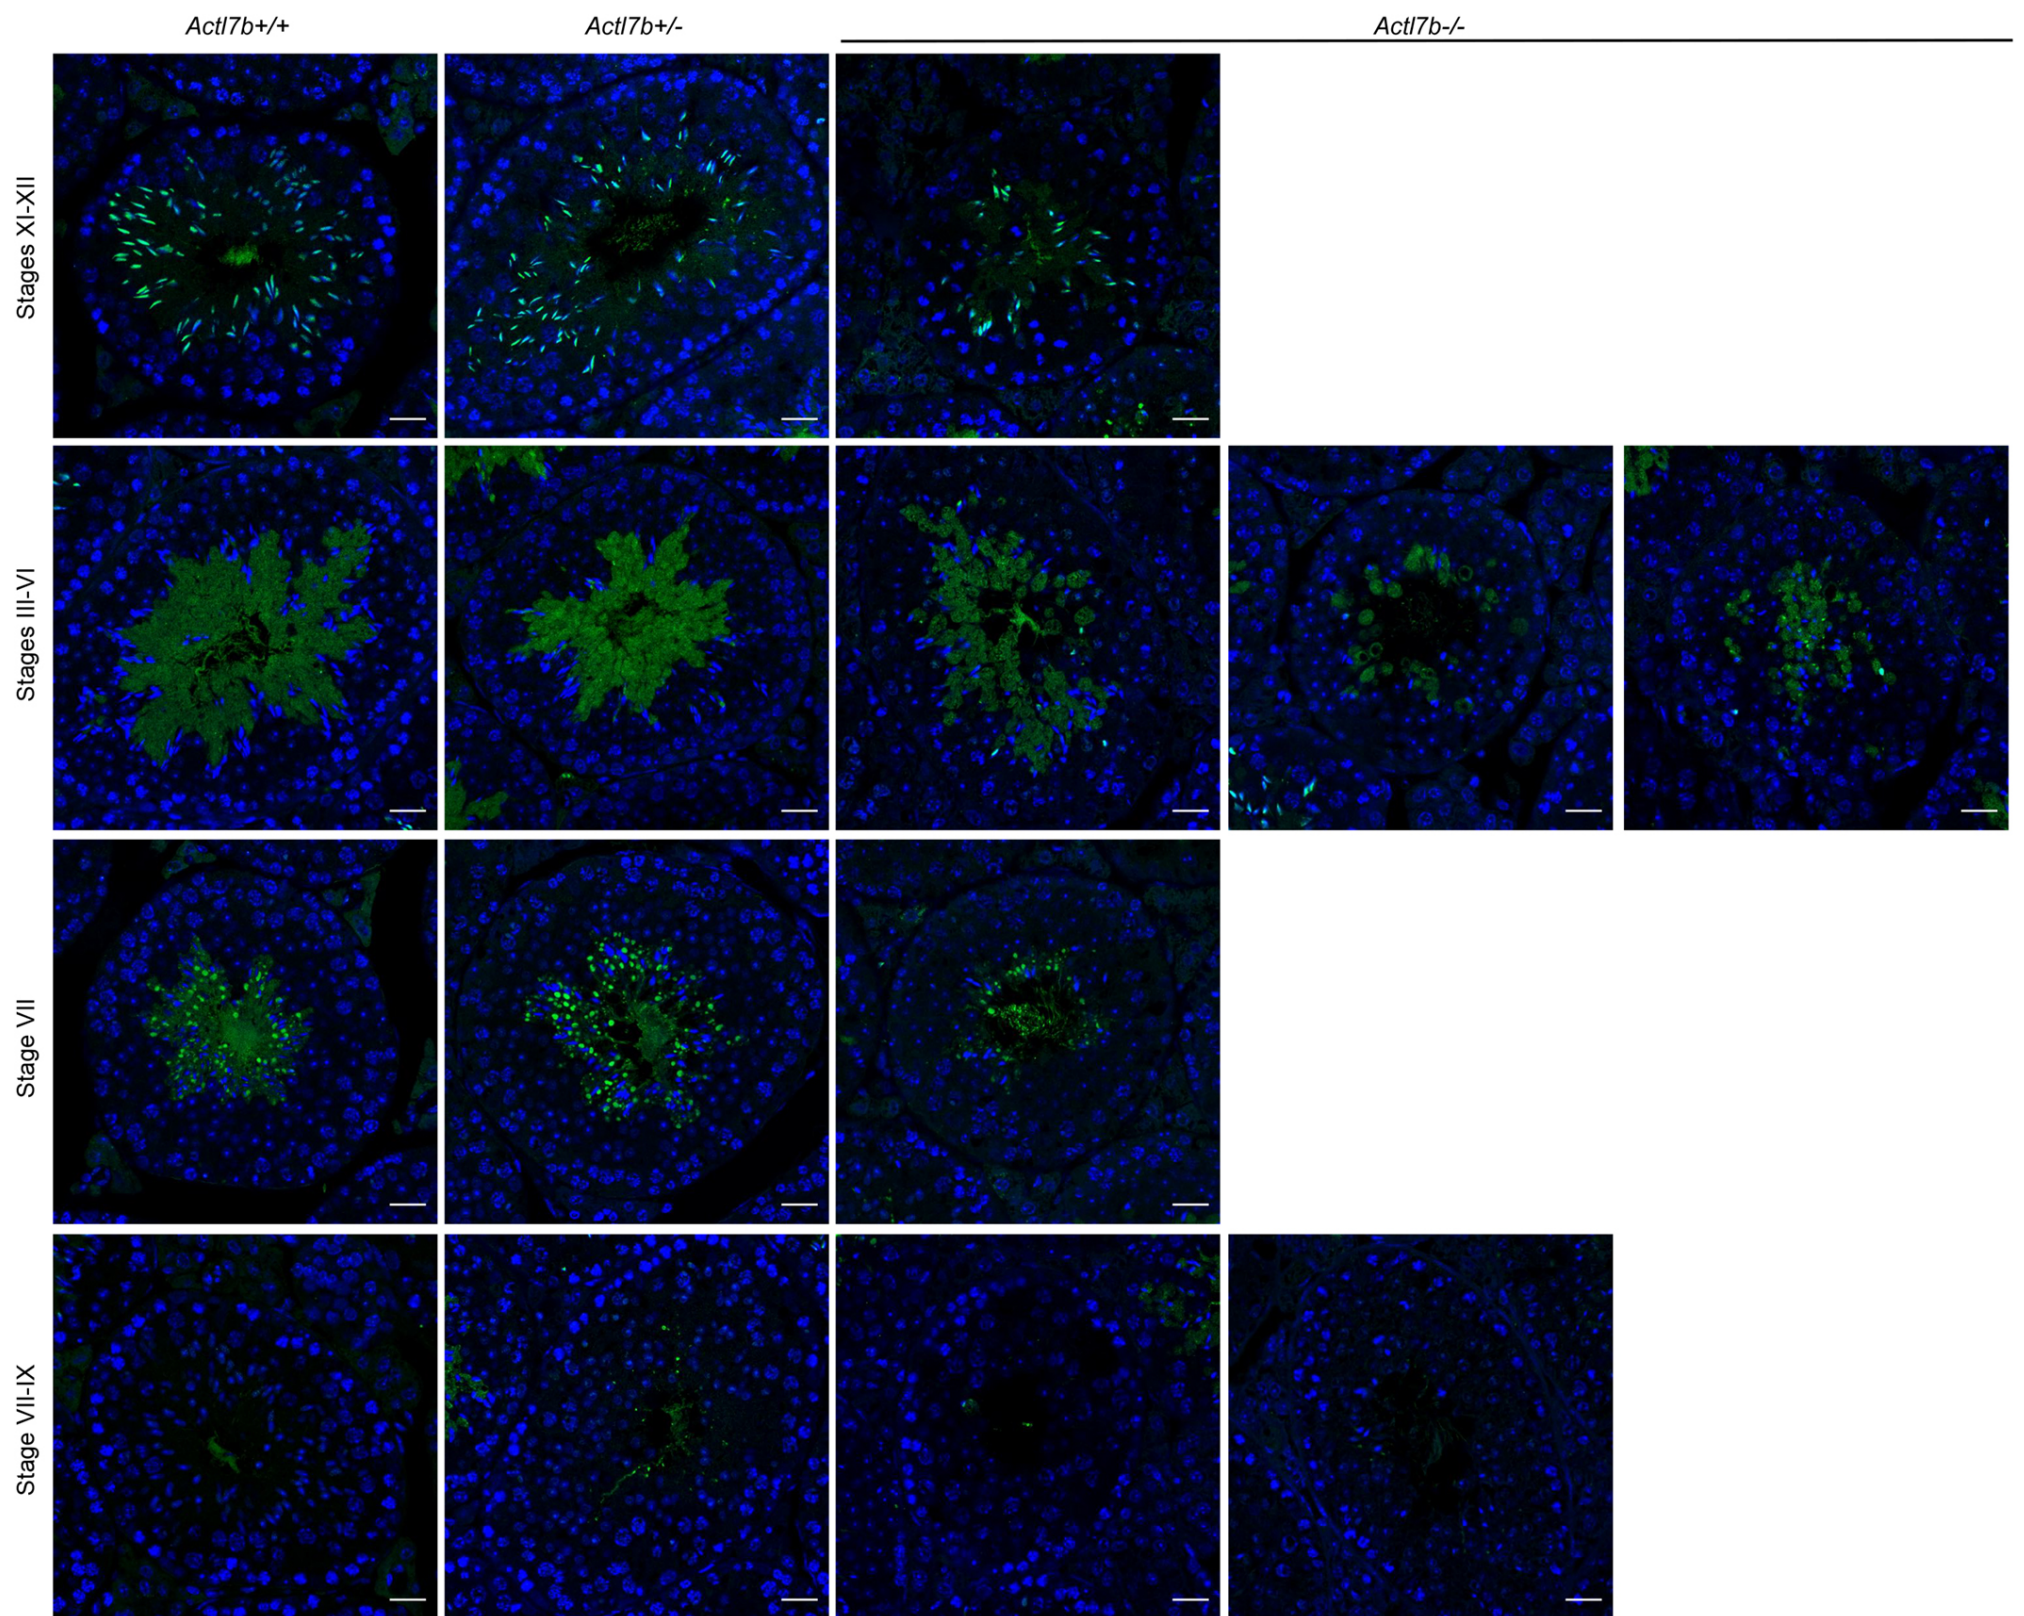

**Fig. S11.** Immunofluorescent staining against DYNLL1 in seminiferous tubules of *Actl7b*<sup>+/+</sup>, *Actl7b*<sup>+/-</sup> and *Actl7b*<sup>-/-</sup> mice. Scale: 20  $\mu$ m.

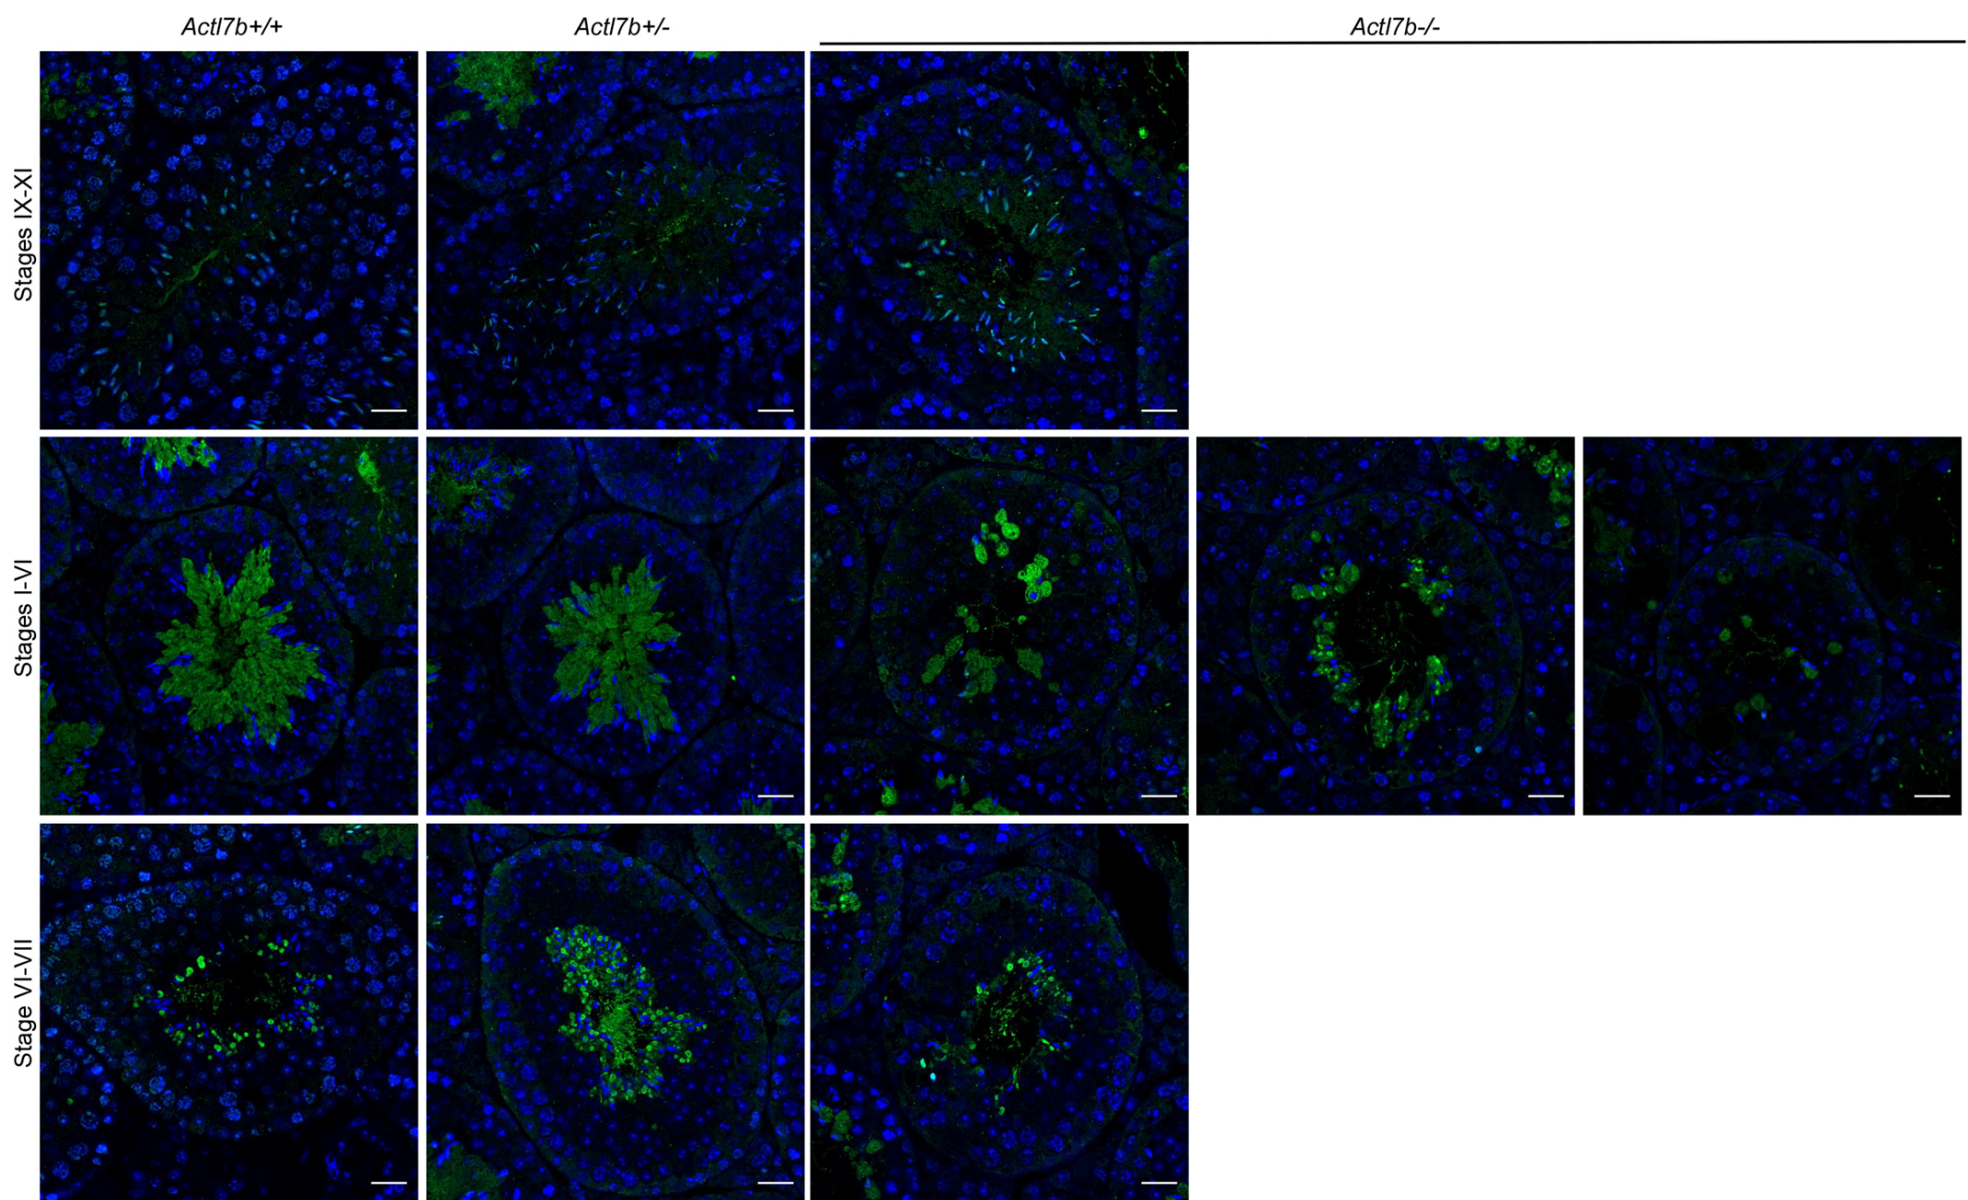

**Fig. S12.** Immunofluorescent staining against DYNLL2 in seminiferous tubules of *Actl7b*<sup>+/+</sup>, *Actl7b*<sup>+/-</sup> and *Actl7b*<sup>-/-</sup> mice. Scale: 20  $\mu$ m.

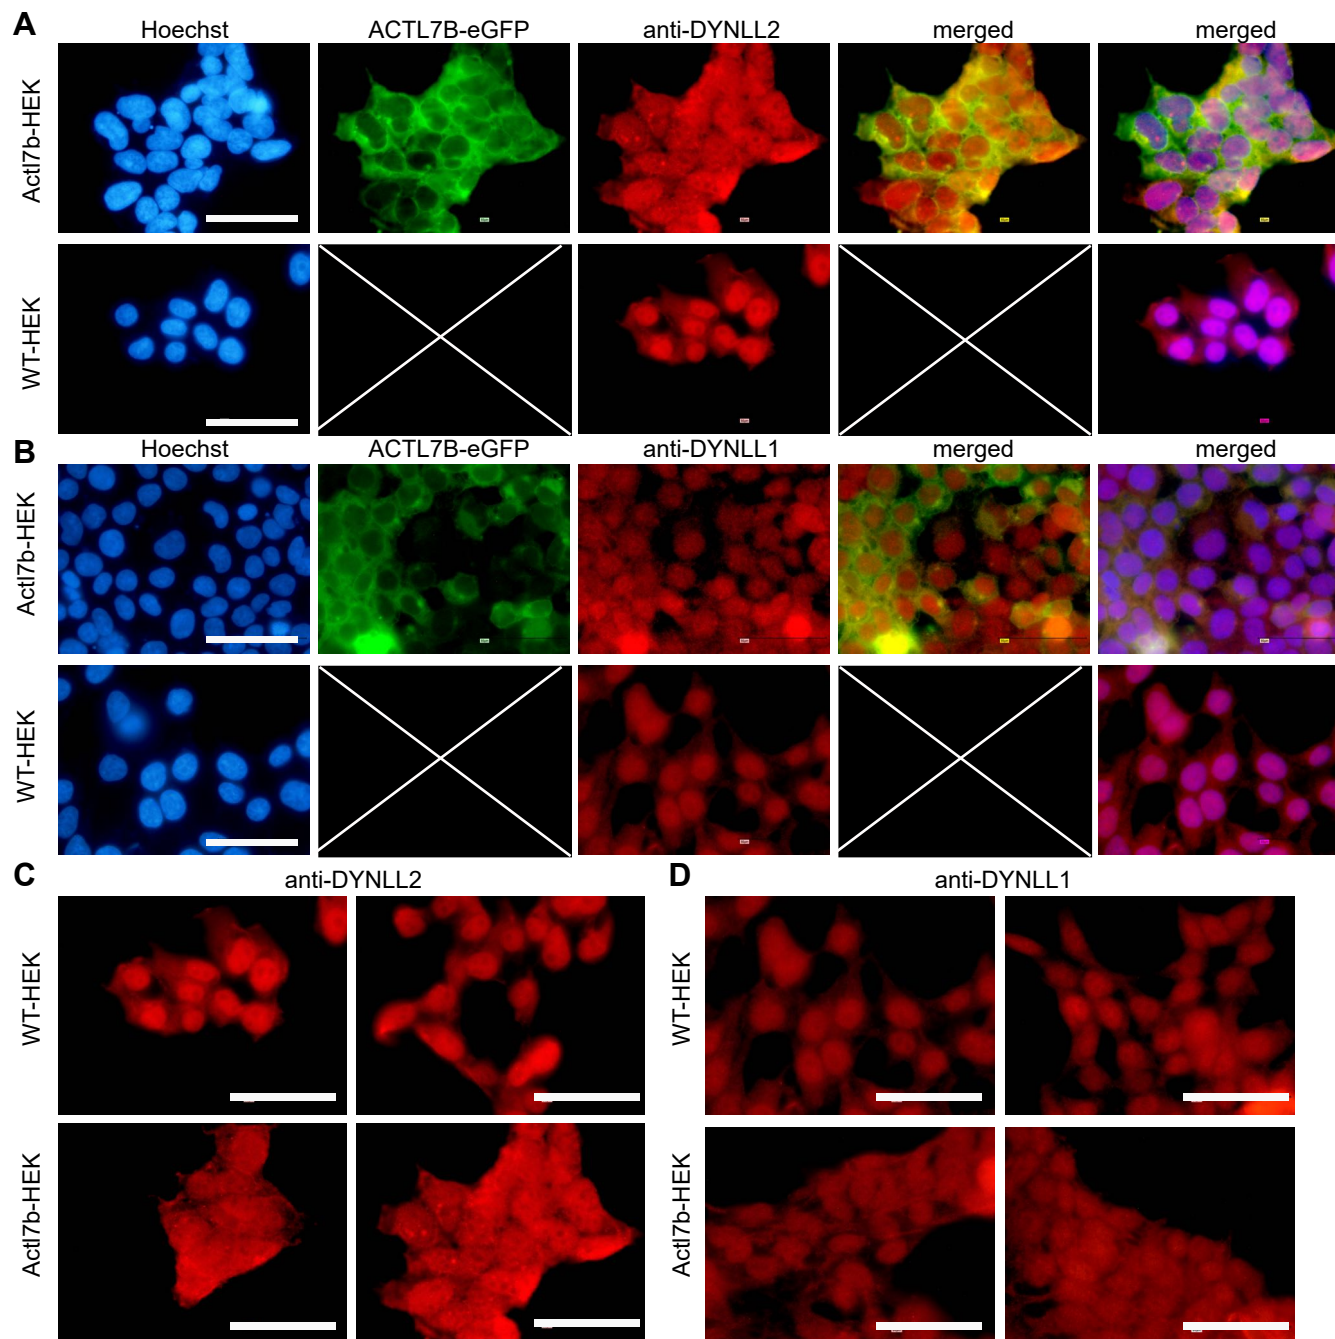

**Fig. S13. ACTL7B and DYNLL1/2 *in vitro*.** (A) IC staining against DYNLL2 in a stable ACTL7B-eGFP expressing HEK cell line and WT HEK cells. (B) IC staining against DYNLL1 in a stable ACTL7B-eGFP expressing HEK cell line and WT HEK cells. (C) IC staining against DYNLL2 in a stable ACTL7B-eGFP expressing HEK cell line and WT HEK cells. (D) IC staining against DYNLL1 in a stable ACTL7B-eGFP expressing HEK cell line and WT HEK cells. Scale: 50  $\mu$ m

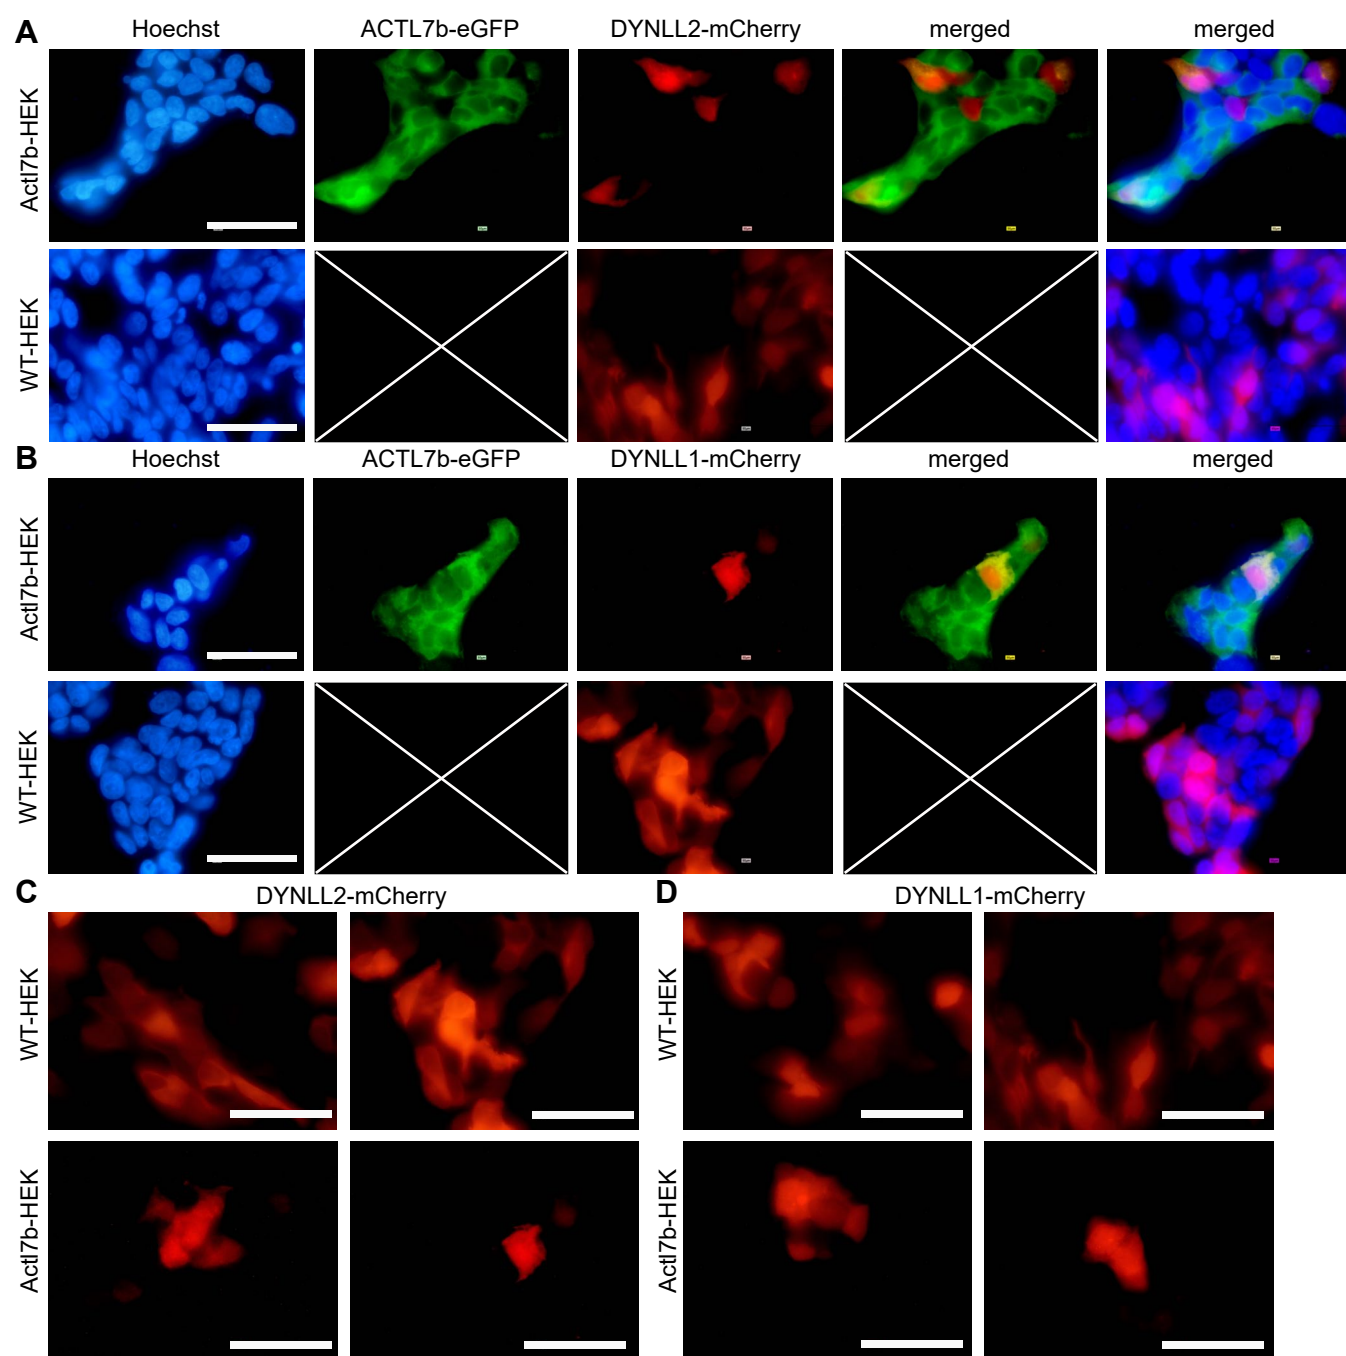

**Fig. S14. ACTL7B and murine DYNLL1/2 *in vitro*.** (A) Images of mCherry-tagged DYNLL2 in a stable ACTL7B-eGFP expressing HEK cell line and WT HEK cells. (B) Images of mCherry-tagged DYNLL1 in a stable ACTL7B-eGFP expressing HEK cell line and WT HEK cells. (C) Images of mCherry-tagged DYNLL2 in a stable ACTL7B-eGFP expressing HEK cell line and WT HEK cells. (D) Images of mCherry-tagged DYNLL1 in a stable ACTL7B-eGFP expressing HEK cell line and WT HEK cells. Scale: 50  $\mu$ m.

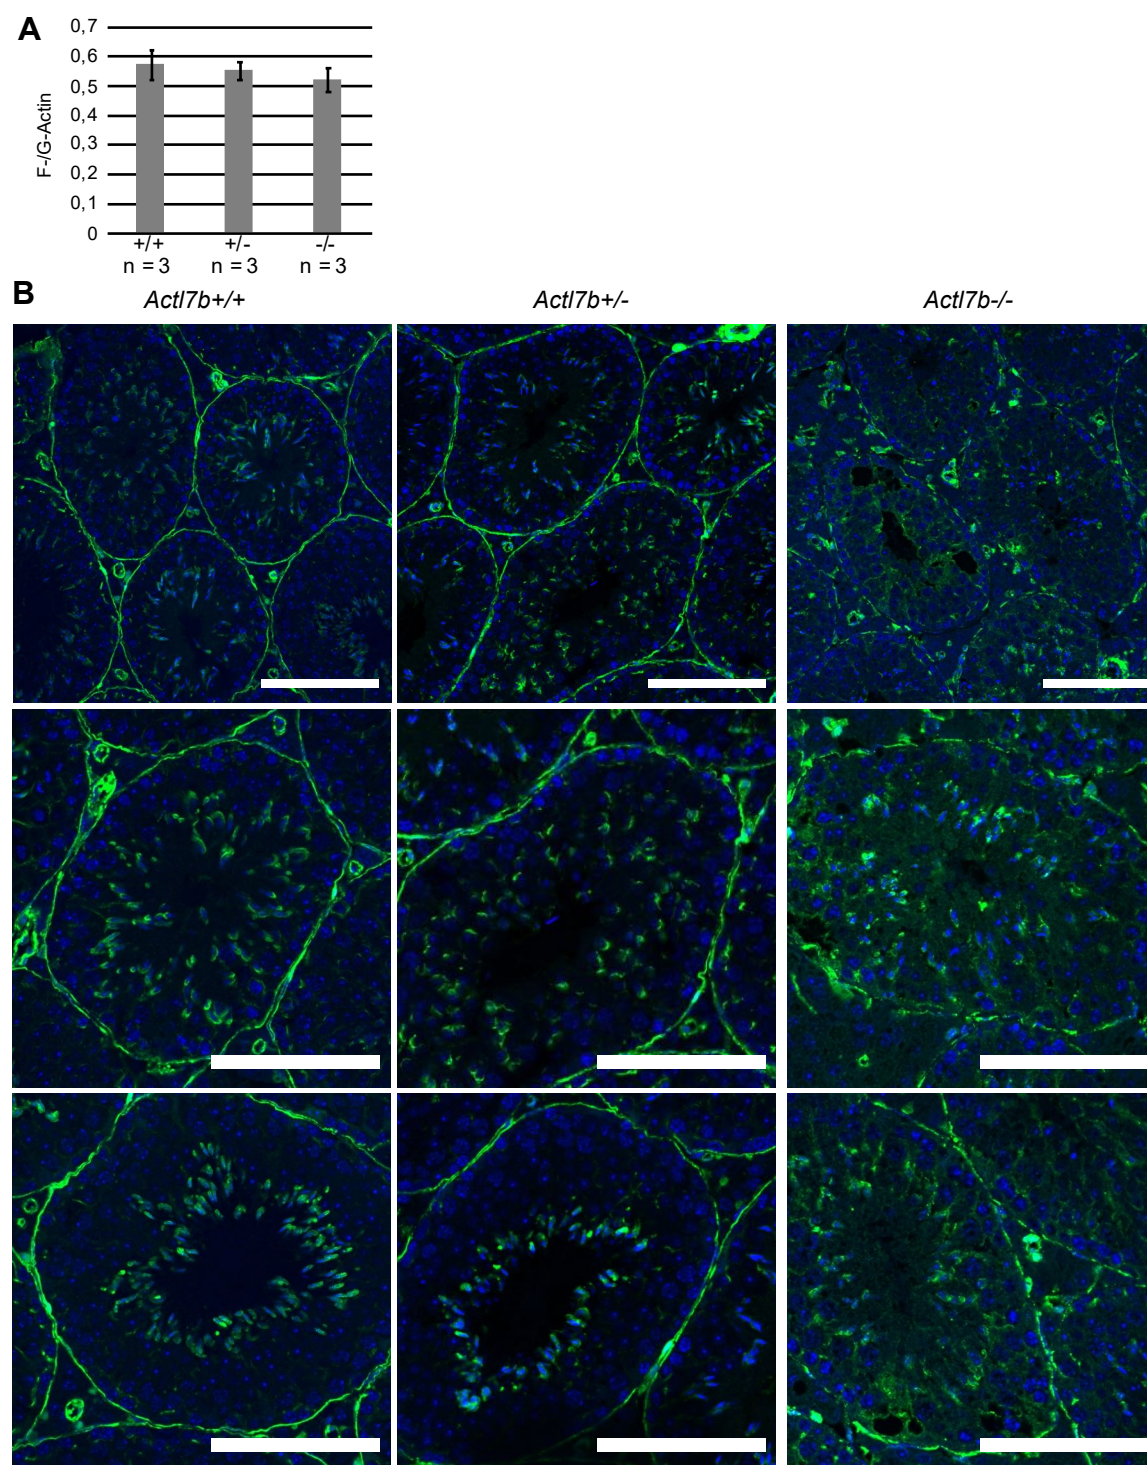

**Fig. S15. Filamentous actin in seminiferous tubules of *Act17b*<sup>+/+</sup>, *Act17b*<sup>+/-</sup> and *Act17b*<sup>-/-</sup> mice. (A)** F-/G-Actin ratio determined for whole testis extracts of *Act17b*<sup>+/+</sup>, *Act17b*<sup>+/-</sup> and *Act17b*<sup>-/-</sup> mice. **(B)** Immunofluorescent staining of filamentous actin on *Act17b*<sup>+/+</sup>, *Act17b*<sup>+/-</sup> and *Act17b*<sup>-/-</sup> testis. Scale: 100  $\mu$ m.

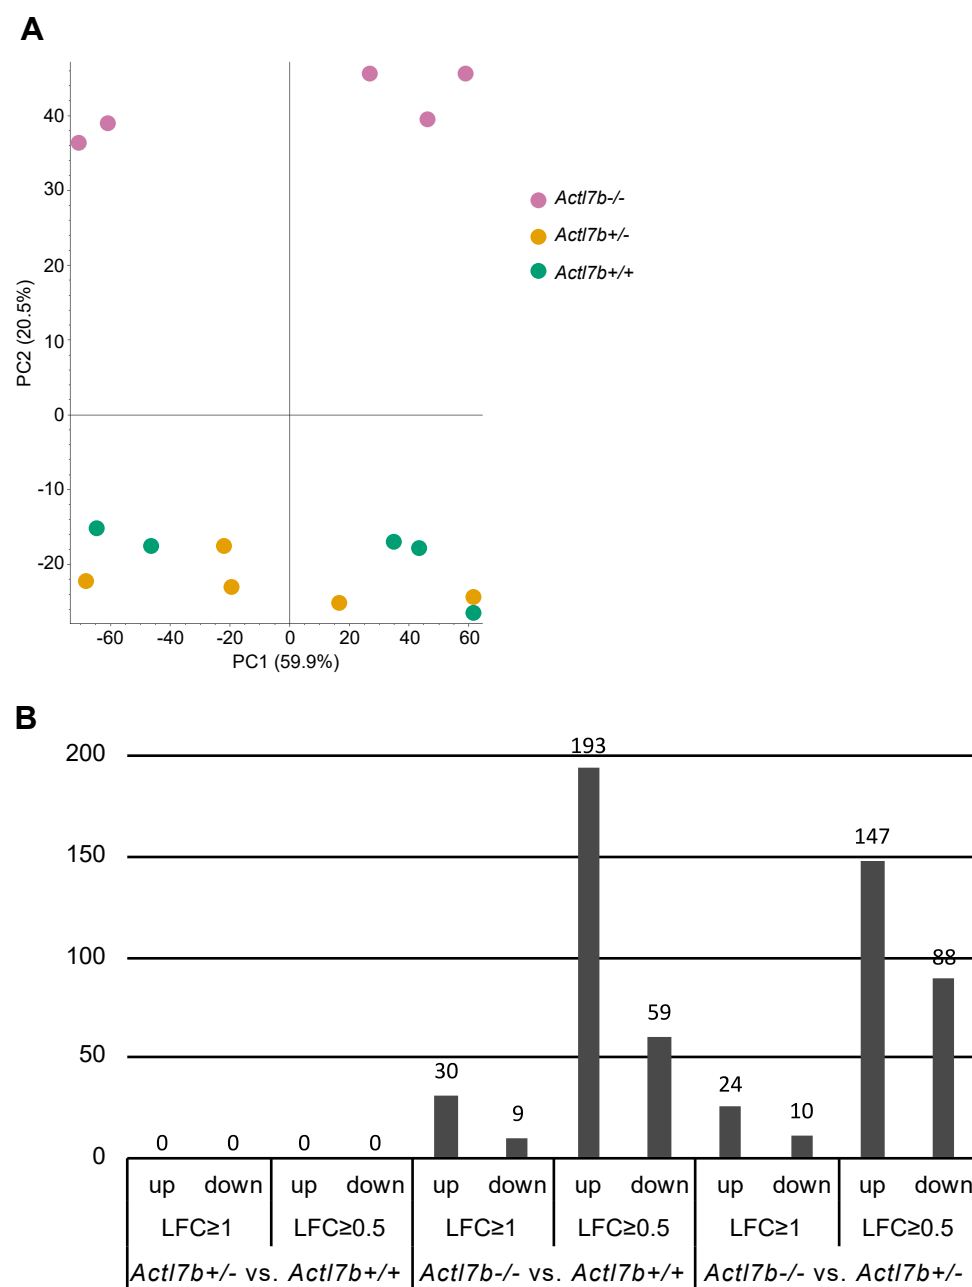

**Fig. S16. Proteomic analysis of *Actl7b*<sup>-/-</sup>, *Actl7b*<sup>+/-</sup> and *Actl7b*<sup>+/+</sup> whole testis. (A)** Principal component analysis (PCA) of *Actl7b*<sup>+/+</sup>, *Actl7b*<sup>+/-</sup> and *Actl7b*<sup>-/-</sup> testis (n = 5). **(B)** Number of differentially abundant (DA) proteins in *Actl7b*<sup>+/-</sup> vs. *Actl7b*<sup>+/+</sup>, *Actl7b*<sup>-/-</sup> vs. *Actl7b*<sup>+/+</sup> and *Actl7b*<sup>-/-</sup> vs. *Actl7b*<sup>+/-</sup> testis. The number of higher (up) and lower (down) abundant proteins are indicated. Results are given with an adjusted p-value ≤ 0.05 and a log2-fold change (LFC) of ≥1 and ≥0.05, respectively.



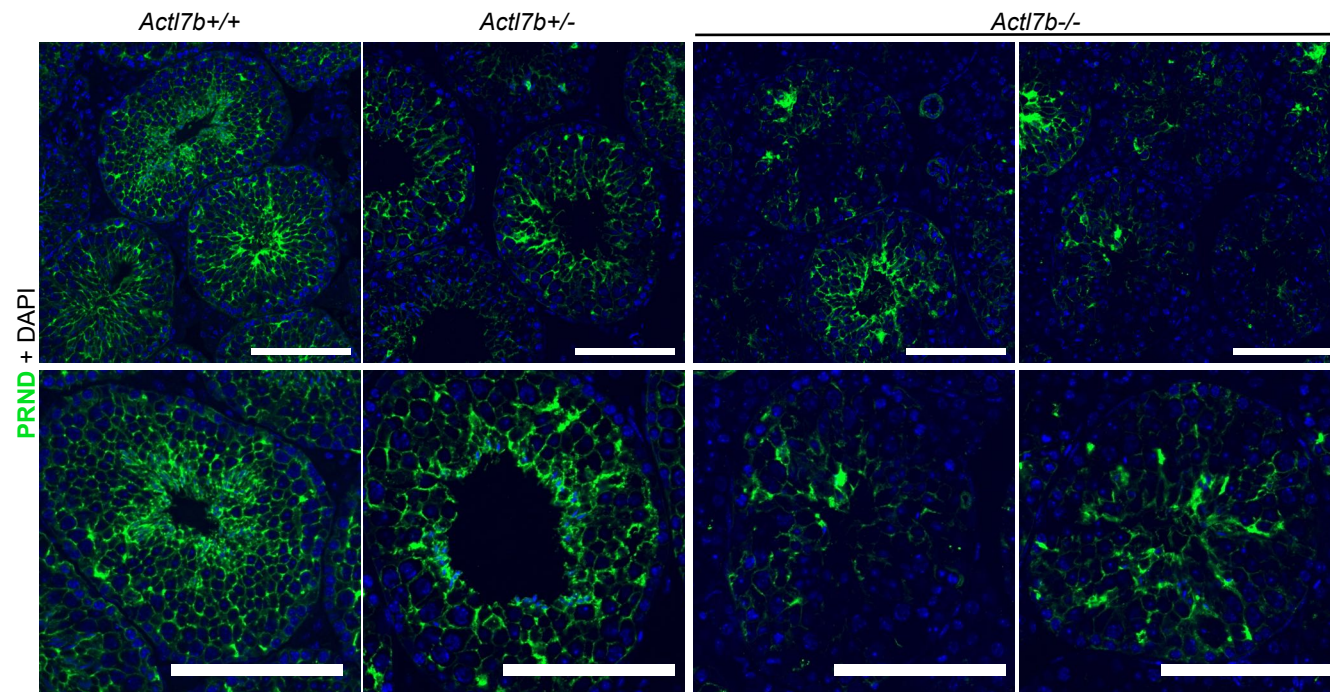

**Fig. S17. IHC staining against PRND on *Actl7b*-deficient testicular sections.** IHC stainings against PRND on *Actl7b*<sup>+/+</sup>, *Actl7b*<sup>+/-</sup> and *Actl7b*<sup>-/-</sup> testis sections. DAPI was used as the counterstain. Scale: 100  $\mu$ m.

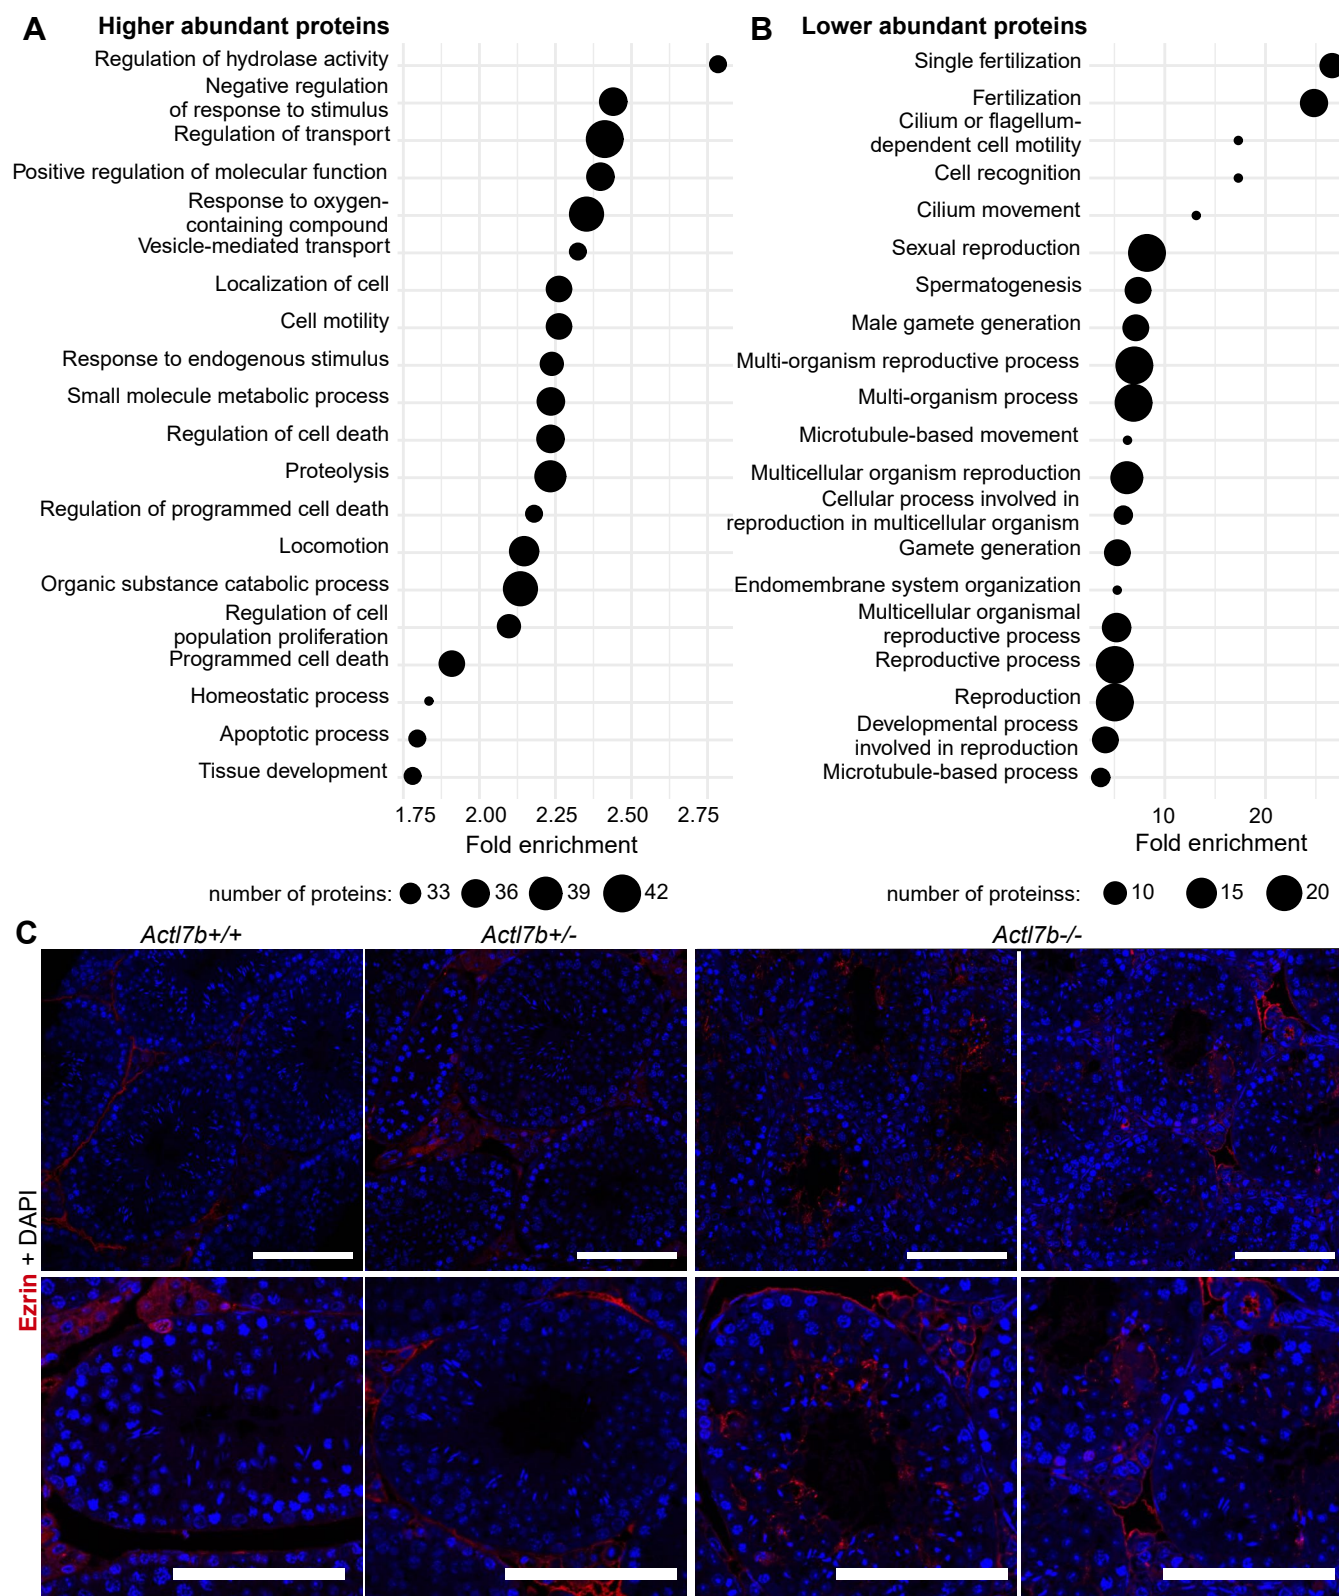

**Fig. S18. Enrichment analysis and IHC staining against PRND on *Act17b*-deficient testicular sections. (A-B)** Dot plots of the top twenty gene ontology (GO)-biological process terms significantly enriched in the higher abundant (A) and lower abundant (B) proteins in *Act17b*<sup>-/-</sup> vs. *Act17b*<sup>+/+</sup> samples ( $p \leq 0.05$ , LFC  $\leq 0.05$ ). Dot sizes represent the number of proteins contributing to the GO-term. (C) IHC stainings against ezrin (red) on *Act17b*<sup>+/+</sup>, *Act17b*<sup>+/-</sup> and *Act17b*<sup>-/-</sup> testis sections. DAPI was used as the counterstain. Scale: 100  $\mu$ m.

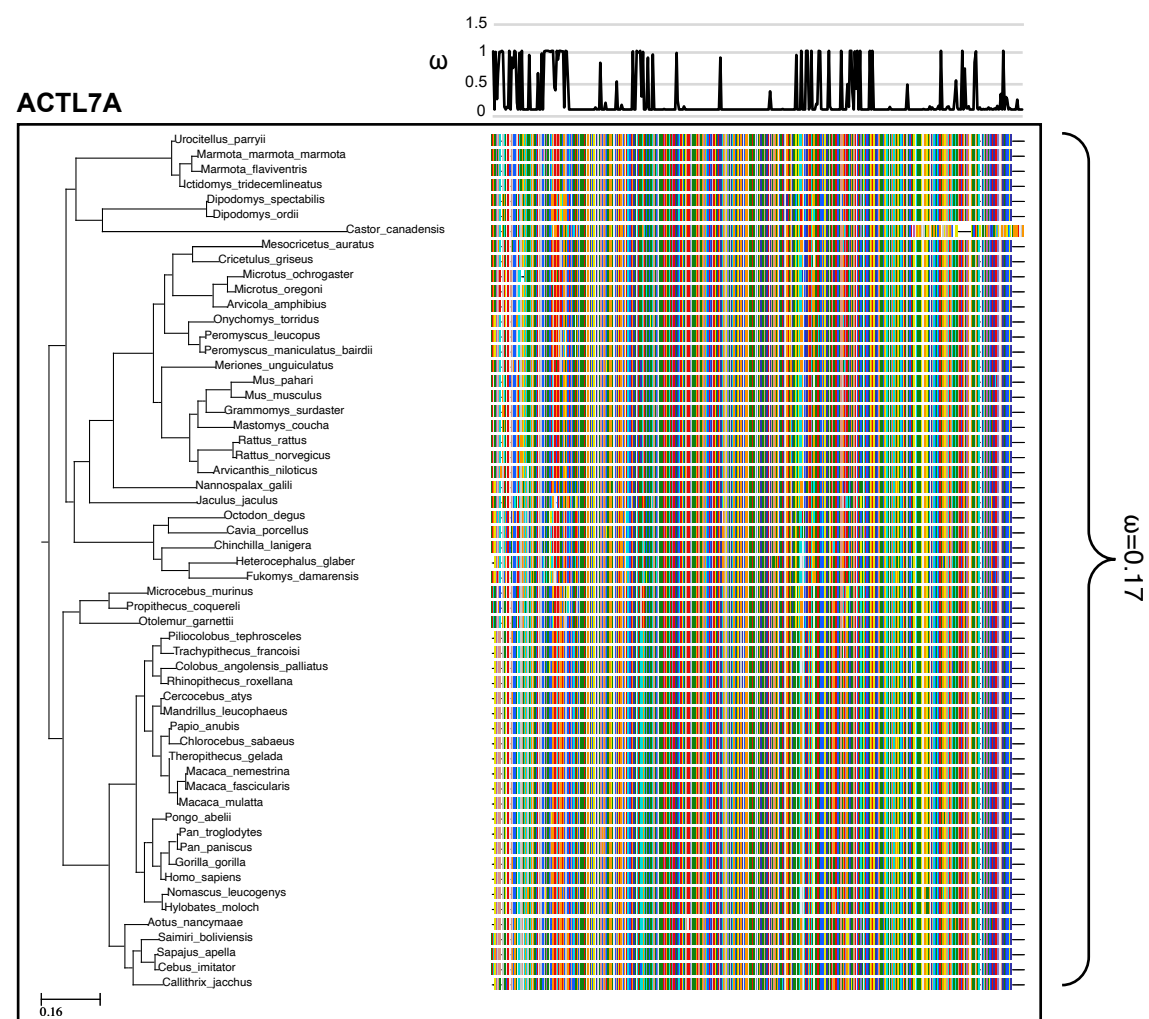

**Fig. S19. Species phylogeny with branch length representing number of nucleotide substitutions per codon with schematic representation of ACTL7A amino acid alignment used in the PAML CodeML analysis.** Evolutionary rate ( $\omega$ ) obtained by CodeML models M0 is shown for the whole alignment. The graph on top shows the evolutionary rate ( $\omega$ ) per codon sites across the whole tree (CodeML model M1a). See also: Table 1.

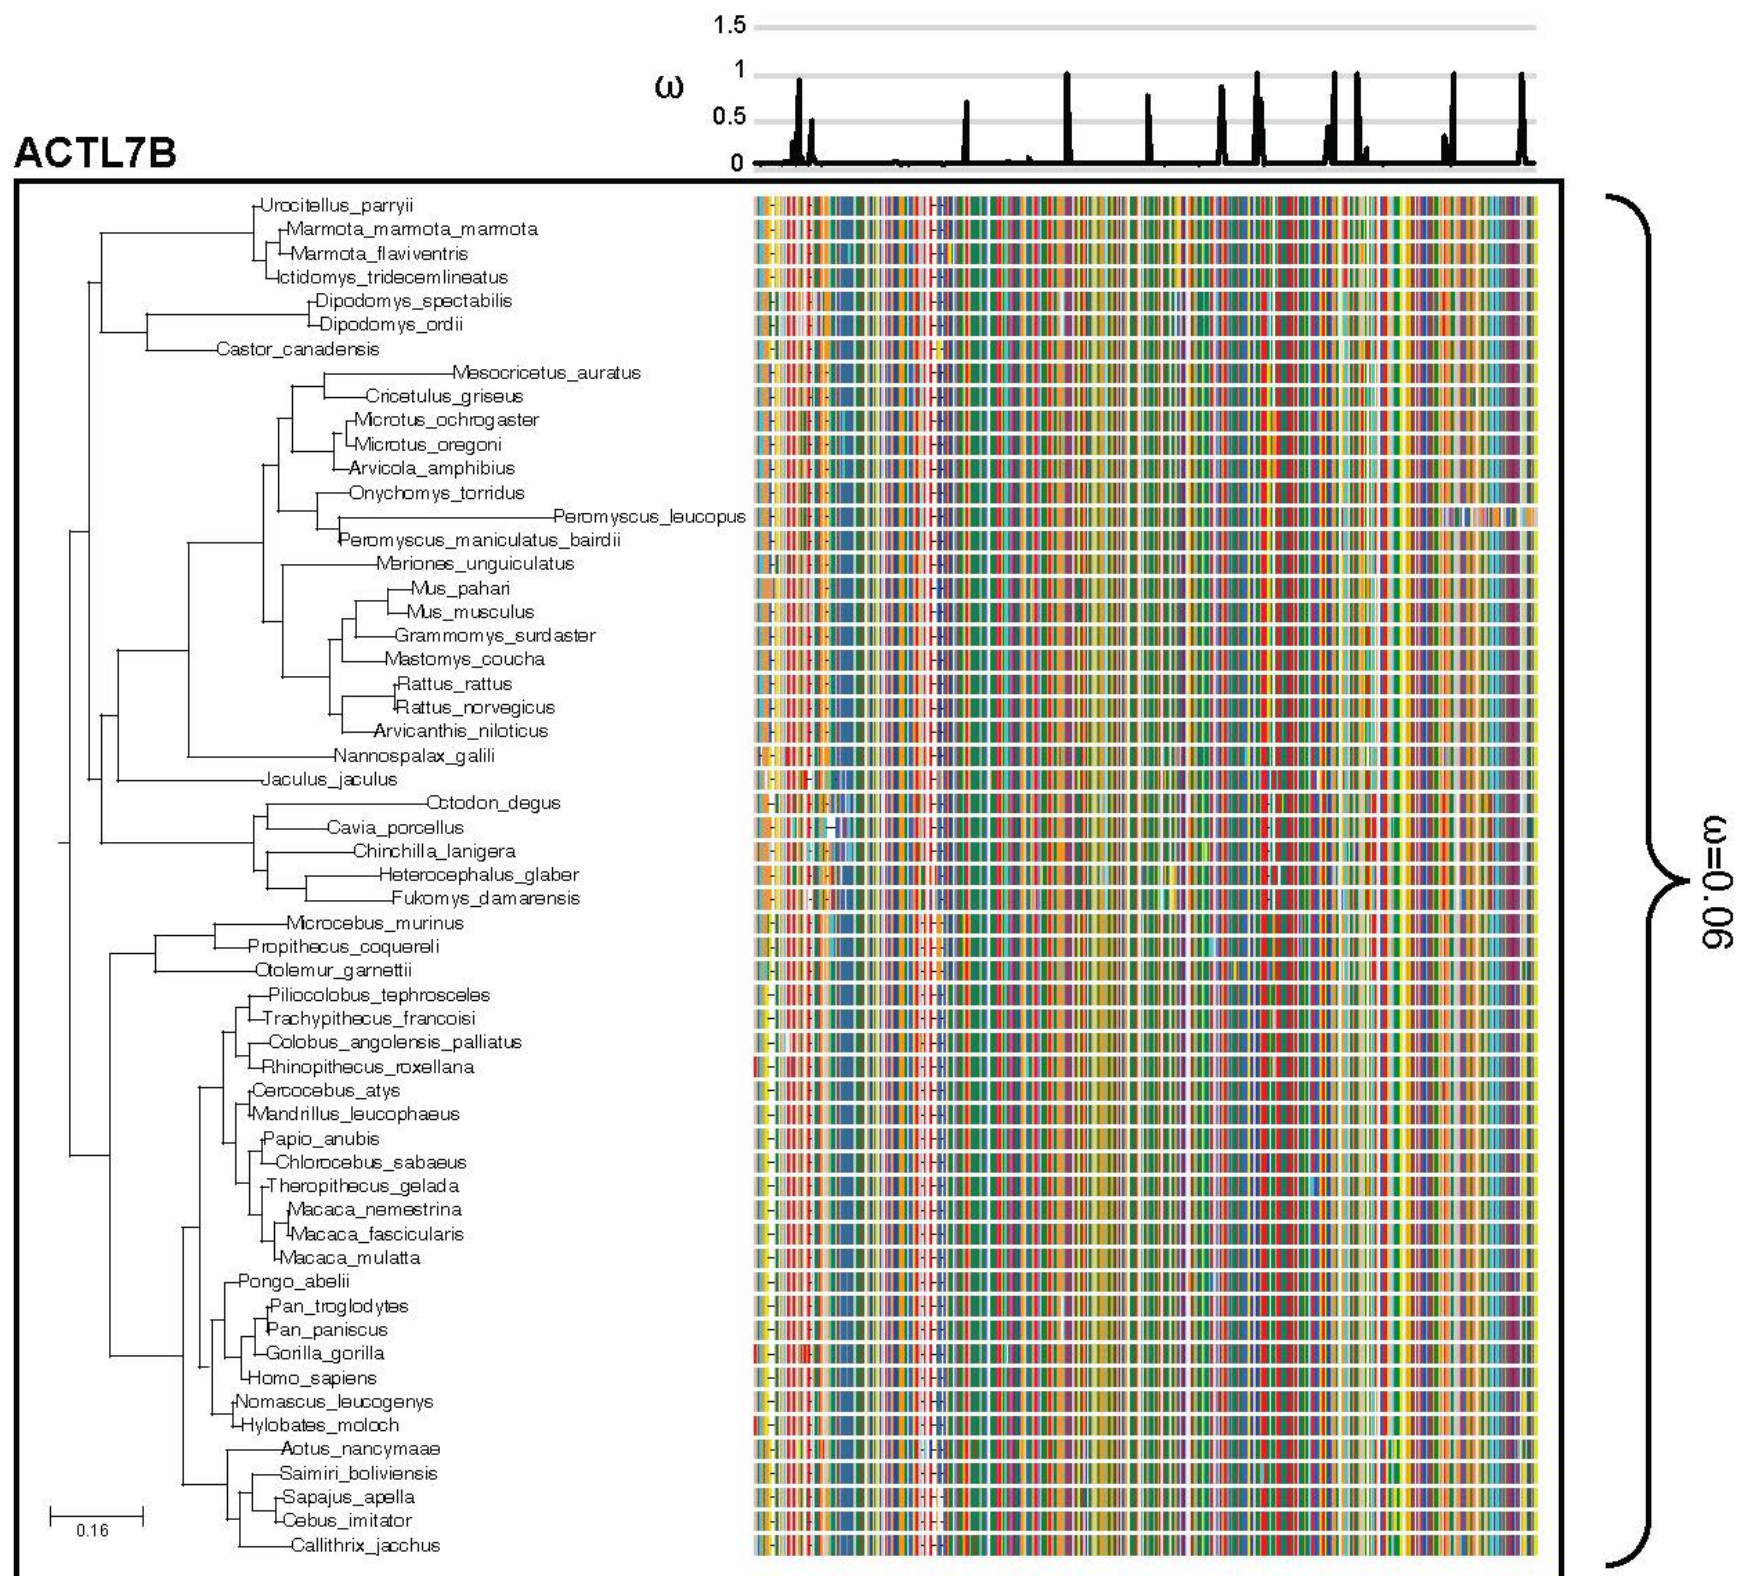

**Fig. S20. Species phylogeny with branch length representing number of nucleotide substitutions per codon with schematic representation of ACTL7B amino acid alignment used in the PAML CodeML analysis.** Evolutionary rate ( $\omega$ ) obtained by CodeML models M0 is shown for the whole alignment. The graph on top shows the evolutionary rate ( $\omega$ ) per codon sites across the whole tree (CodeML model M1a). See also: Table 1.

**Table S1. Mass spectrometry datasets of proteins identified by ACTL7B CoIP using wild-type testes.**

Available for download at

<https://journals.biologists.com/dev/article-lookup/doi/10.1242/dev.201593#supplementary-data>

**Table S2. Dynll2 validated as interaction partner of ACTL7B by targeted analysis of mass spectrometry results from HEK cells expressing ACTL7B-GFP.**

Available for download at

<https://journals.biologists.com/dev/article-lookup/doi/10.1242/dev.201593#supplementary-data>

**Table S3. Mass spectrometry datasets of whole testes lysates from wild-type, Actl7b<sup>+/-</sup> and Actl7b<sup>-/-</sup> male mice.**

Available for download at

<https://journals.biologists.com/dev/article-lookup/doi/10.1242/dev.201593#supplementary-data>
